# Supplementary material for: Visible-light-promoted cascade cyclization of N-arylacrylamides with bromomethyl sulfone: access to sulfonylmethylated phenanthridines
Source: Royal Society of Chemistry journal article supplement (doi:10.1039/d4ob02041c), 2025-01-01
Supplement: d4ob02041c1.pdf [file d4ob02041c1.pdf]

*supporting information*

**Visible-light-promoted cascade cyclization of N-arylacrylamides with  
bromomethyl aryl sulfone: Access to sulfonylmethylated  
phenanthridines**

Qiannan Tan,<sup>a</sup> Xia Mi<sup>a\*</sup> Jingyu Zhang,<sup>a</sup> Chao Pi,<sup>b</sup>

**Table of Contents**

|                                                                                                    |                 |
|----------------------------------------------------------------------------------------------------|-----------------|
| <b>1. General information</b>                                                                      | <b>S2</b>       |
| <b>2. General experimental procedure for the synthesis of sulfonylmethylated phenanthridines 3</b> | <b>S2</b>       |
| <b>3. Optimization of the reaction conditions</b>                                                  | <b>S2-S3</b>    |
| <b>4. Radical-trapping experiments</b>                                                             | <b>S4-S6</b>    |
| <b>5. Light ON/OFF experiments</b>                                                                 | <b>S7</b>       |
| <b>6. Luminescence quenching experiments</b>                                                       | <b>S7-S8</b>    |
| <b>7. Characterization of the products</b>                                                         | <b>S9-S20</b>   |
| <b>8. References</b>                                                                               | <b>S21</b>      |
| <b>9. Copies of <sup>1</sup>H, <sup>13</sup>C and <sup>19</sup>F NMR spectra</b>                   | <b>S22- S51</b> |

## 1. General information

All glassware was thoroughly oven-dried. Unless otherwise stated, all commercial reagents were used without further purification. Column chromatography was performed on silica gel (200-300 mesh) using a proper eluent system.  $^1\text{H}$  NMR,  $^{19}\text{F}$  NMR, and  $^{13}\text{C}$  NMR spectra were recorded on a spectrometer at 400, 376 and 101 MHz, respectively, with deuterated chloroform as the solvent. The chemical shifts  $\delta$  are reported in ppm relative to tetramethylsilane ( $\delta = 0$  ppm) or residual  $\text{CHCl}_3$  ( $\delta = 77.00$  ppm). The following abbreviations were used to describe peak splitting patterns when appropriate: s (singlet), d (doublet), t (triplet), q (quartet), m (multiplet), dd (doublet of doublet), td (triplet of doublet). Coupling constants  $J$  are reported in Hertz (Hz). High-resolution mass spectrometry (HRMS) analyses were performed on a Q-TOF spectrometer with an electrospray ionization (ESI) source. Substrates **1**<sup>[1-3]</sup> and bromomethyl aryl sulfones **2**<sup>[4-6]</sup> were prepared according to the known literatures.

## 2. General experimental procedure for the synthesis of sulfonylmethylated phenanthridines **3**

Under Ar atmosphere, a 25 mL reaction tube equipped with a magnetic stirrer bar was charged with N-(2-cyano-[1,1'-biphenyl]-3-yl)-N-methylmethacrylamide (**1**, 0.1 mmol), bromomethyl aryl sulfonyl (**2**, 0.2 mmol), Ir(ppy)<sub>3</sub> (0.002 mmol, 2 mol%), 2,6-dimethylpyridine (0.2 mmol), and dimethyl sulfoxide (DMSO, 1.0 mL). The reaction mixture was stirred at room temperature for 24 h under 5 W blue LED irradiation. After completion, the reaction mixture was diluted with water (10 mL) and extracted with ethyl acetate (EtOAc, 10 mL  $\times$  3). The combined organic layers were dried over anhydrous  $\text{MgSO}_4$  and concentrated under reduced pressure. The crude product was purified by silica gel column chromatography (eluent: EA/PE) to give the desired product **3**.

## 3. Optimization of the reaction conditions

**Table S1.** Screening of photocatalyst

| Entry           | Photocatalyst                                                     | Base                      | Solvent | Yield <sup>a</sup> |
|-----------------|-------------------------------------------------------------------|---------------------------|---------|--------------------|
| <b>1</b>        | <b>Ir(ppy)<sub>3</sub></b>                                        | $\text{Na}_2\text{HPO}_4$ | DMF     | <b>56%</b>         |
| 2               | 4CzIPN                                                            | $\text{Na}_2\text{HPO}_4$ | DMF     | N.D                |
| 3               | Rose Bengal                                                       | $\text{Na}_2\text{HPO}_4$ | DMF     | N.D                |
| 4               | EosinY                                                            | $\text{Na}_2\text{HPO}_4$ | DMF     | Trace              |
| 5               | Mes-Acr <sup>+</sup>                                              | $\text{Na}_2\text{HPO}_4$ | DMF     | N.D                |
| 6               | Rhodamine 6G                                                      | $\text{Na}_2\text{HPO}_4$ | DMF     | N.D                |
| 7               | Fluorescent                                                       | $\text{Na}_2\text{HPO}_4$ | DMF     | 10%                |
| 8               | $\text{Ru}(\text{bpy})_2\text{Cl}_2$                              | $\text{Na}_2\text{HPO}_4$ | DMF     | N.D                |
| 9               | methylene blue                                                    | $\text{Na}_2\text{HPO}_4$ | DMF     | N.D                |
| 10              | $[\text{Ir}(\text{dtbbpy})(\text{ppy})_2][\text{PF}_6]$           | $\text{Na}_2\text{HPO}_4$ | DMF     | 13%                |
| 11              | $[\text{Ir}\{\text{dFCF}_3\text{ppy}\}_2(\text{bpy})]\text{PF}_6$ | $\text{Na}_2\text{HPO}_4$ | DMF     | Trace              |
| 12              | /                                                                 | $\text{Na}_2\text{HPO}_4$ | DMF     | N.D                |
| 13 <sup>b</sup> | <b>Ir(ppy)<sub>3</sub></b>                                        | $\text{Na}_2\text{HPO}_4$ | DMF     | 25%                |

<sup>a</sup> Reaction conditions: **1a** (0.1 mmol), **2a** (0.2 mmol), PC. (2 mol%),  $\text{Na}_2\text{HPO}_4$  (0.2 mmol, 2 equiv), DMF (1 mL), 5 W blue LED, rt, 24 h, Ar. Isolation yields. <sup>b</sup> **1a** (0.2 mmol), **2a** (0.1 mmol)

**Table S2.** Screening of solvent

| Entry           | Photocatalyst        | Base                             | Solvent                        | Yield <sup>a</sup> |
|-----------------|----------------------|----------------------------------|--------------------------------|--------------------|
| 1               | Ir(ppy) <sub>3</sub> | Na <sub>2</sub> HPO <sub>4</sub> | <b>DMSO</b>                    | <b>68%</b>         |
| 2               | Ir(ppy) <sub>3</sub> | Na <sub>2</sub> HPO <sub>4</sub> | CH <sub>3</sub> CN             | 10%                |
| 3               | Ir(ppy) <sub>3</sub> | Na <sub>2</sub> HPO <sub>4</sub> | THF                            | 15%                |
| 4               | Ir(ppy) <sub>3</sub> | Na <sub>2</sub> HPO <sub>4</sub> | DCM                            | 45%                |
| 5               | Ir(ppy) <sub>3</sub> | Na <sub>2</sub> HPO <sub>4</sub> | PhMe                           | 17%                |
| 6               | Ir(ppy) <sub>3</sub> | Na <sub>2</sub> HPO <sub>4</sub> | EtOH                           | N.D                |
| 7               | Ir(ppy) <sub>3</sub> | Na <sub>2</sub> HPO <sub>4</sub> | acetone                        | Trace              |
| 8               | Ir(ppy) <sub>3</sub> | Na <sub>2</sub> HPO <sub>4</sub> | CHCl <sub>3</sub>              | 28%                |
| 9               | Ir(ppy) <sub>3</sub> | Na <sub>2</sub> HPO <sub>4</sub> | MeOH                           | 16%                |
| 10              | Ir(ppy) <sub>3</sub> | Na <sub>2</sub> HPO <sub>4</sub> | EA                             | 13%                |
| 11              | Ir(ppy) <sub>3</sub> | Na <sub>2</sub> HPO <sub>4</sub> | DCE                            | 10%                |
| 12              | Ir(ppy) <sub>3</sub> | Na <sub>2</sub> HPO <sub>4</sub> | DMSO/H <sub>2</sub> O<br>(1:1) | N.D                |
| 13              | Ir(ppy) <sub>3</sub> | Na <sub>2</sub> HPO <sub>4</sub> | DMSO/DMF<br>(1:1)              | 38%                |
| 14 <sup>b</sup> | Ir(ppy) <sub>3</sub> | Na <sub>2</sub> HPO <sub>4</sub> | DMSO                           | Trace              |
| 15 <sup>c</sup> | Ir(ppy) <sub>3</sub> | Na <sub>2</sub> HPO <sub>4</sub> | DMSO                           | N.D                |
| 16 <sup>d</sup> | Ir(ppy) <sub>3</sub> | Na <sub>2</sub> HPO <sub>4</sub> | DMSO                           | 65%                |

<sup>a</sup> Reaction conditions: **1a** (0.1 mmol), **2a** (0.2 mmol), Ir(ppy)<sub>3</sub> (2 mol%), Na<sub>2</sub>HPO<sub>4</sub> (0.2 mmol, 2 equiv), solvent (1 mL), 5 W blue LED, rt, 24 h, Ar. Isolation yields. <sup>b</sup> In the dark. <sup>c</sup> air. <sup>d</sup> 26 W CFL.

**Table S3.** Screening of base

| Entry           | Photocatalyst        | Base                            | Solvent | Yield <sup>a</sup> |
|-----------------|----------------------|---------------------------------|---------|--------------------|
| 1               | Ir(ppy) <sub>3</sub> | Li <sub>2</sub> CO <sub>3</sub> | DMSO    | 50%                |
| 2               | Ir(ppy) <sub>3</sub> | K <sub>2</sub> HPO <sub>4</sub> | DMSO    | 60%                |
| 3               | Ir(ppy) <sub>3</sub> | K <sub>2</sub> CO <sub>3</sub>  | DMSO    | 49%                |
| 4               | Ir(ppy) <sub>3</sub> | Na <sub>2</sub> CO <sub>3</sub> | DMSO    | 53%                |
| 5               | Ir(ppy) <sub>3</sub> | NaOAc                           | DMSO    | 52%                |
| 6               | Ir(ppy) <sub>3</sub> | Et <sub>3</sub> N               | DMSO    | 27%                |
| 7               | Ir(ppy) <sub>3</sub> | DBU                             | DMSO    | 63%                |
| 8               | Ir(ppy) <sub>3</sub> | <b>2,6-lutidine</b>             | DMSO    | <b>70%</b>         |
| 9               | Ir(ppy) <sub>3</sub> | BDMEP                           | DMSO    | 44%                |
| 10              | Ir(ppy) <sub>3</sub> | DTBMP                           | DMSO    | 40%                |
| 11              | Ir(ppy) <sub>3</sub> | 2,6-Di-iso-propylpyridine       | DMSO    | 45%                |
| 12 <sup>b</sup> | Ir(ppy) <sub>3</sub> | 2,6-lutidine                    | DMSO    | 40%                |
| 13 <sup>c</sup> | Ir(ppy) <sub>3</sub> | 2,6-lutidine                    | DMSO    | 59%                |
| 14 <sup>d</sup> | Ir(ppy) <sub>3</sub> | 2,6-lutidine                    | DMSO    | 63%                |

<sup>a</sup> Reaction conditions: **1a** (0.1 mmol), **2a** (0.2 mmol), Ir(ppy)<sub>3</sub> (2 mol%), base (0.2 mmol, 2 equiv), DMSO (1 mL), 5 W blue LED, rt, 24 h, Ar. Isolation yields. <sup>b</sup> 2,6-lutidine (0.4 mmol, 4 equiv). <sup>c</sup> 12 h. <sup>d</sup> 36 h.

#### 4. Radical-trapping experiments

Two equivalents of radical scavenger TEMPO (2,2,6,6-tetramethylpiperidinoxy), DPE (1,1-diphenylethylene) or BHT (butylated hydroxytoluene) was added to the reaction of **1a** with **2a** in the standard conditions (Scheme S1). After 24 h, the reaction mixture was cooled to room temperature and was detected by HRMS. The adduct **5** of sulfonylmethyl radical was isolated by column chromatography on silica gel. The results were shown in Figure S1-S5.

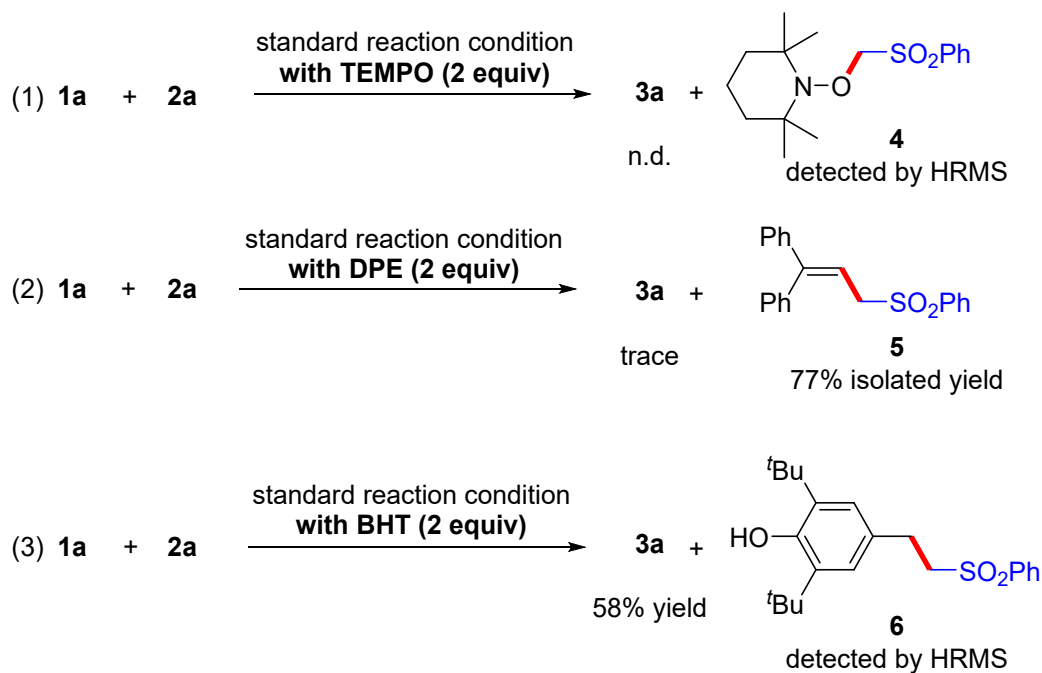

Scheme S1. Radical trapping experiments.

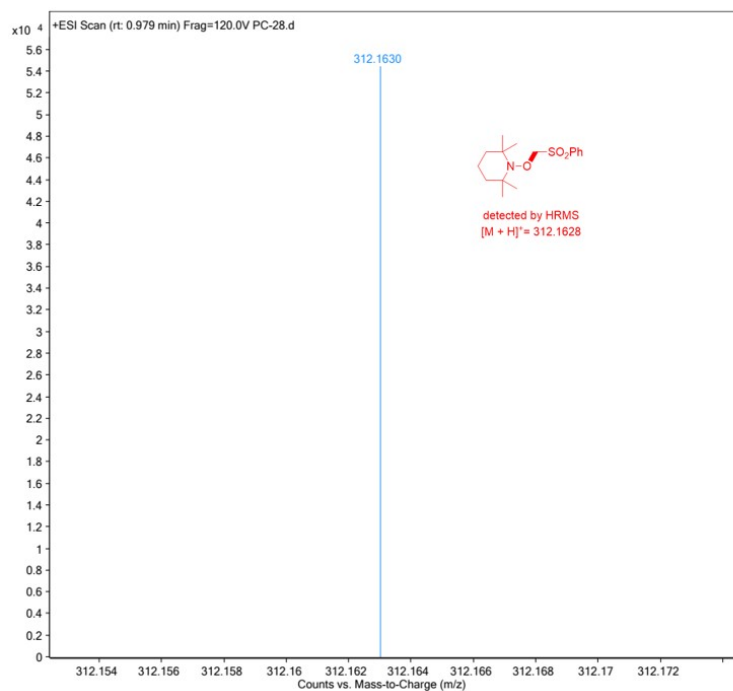

Figure S1. ESI-MS spectrum of the adduct **4**

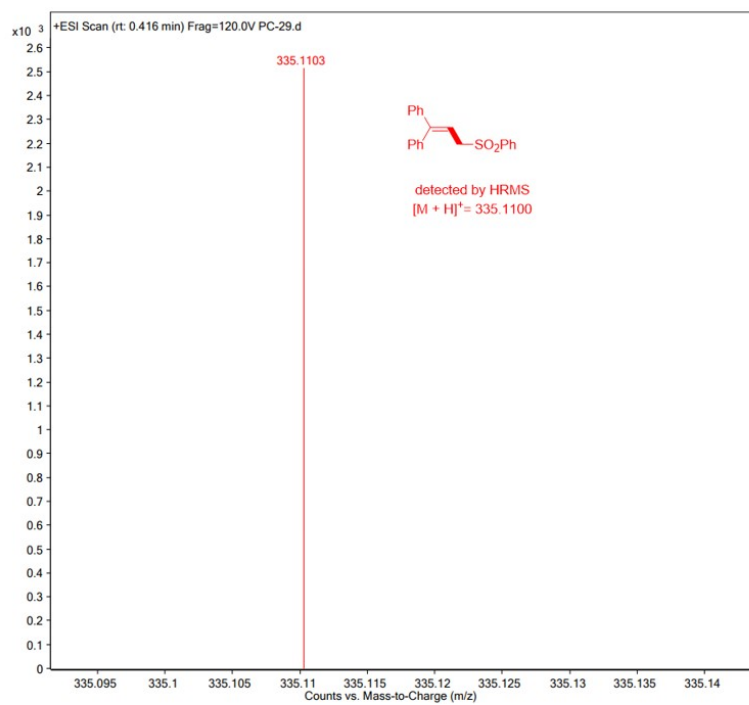

**Figure S2.** ESI-MS spectrum of the adduct **5**

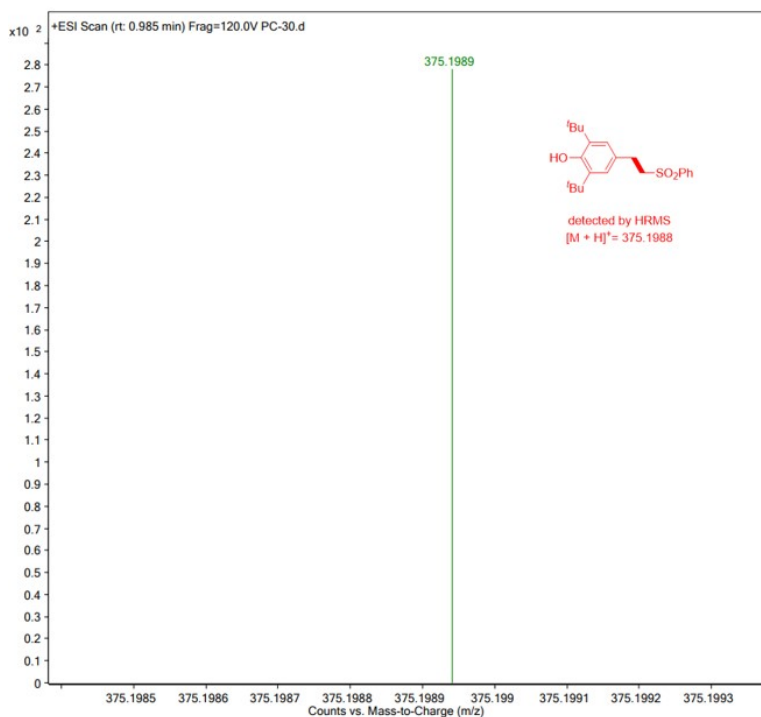

**Figure S3.** ESI-MS spectrum of the adduct **6**

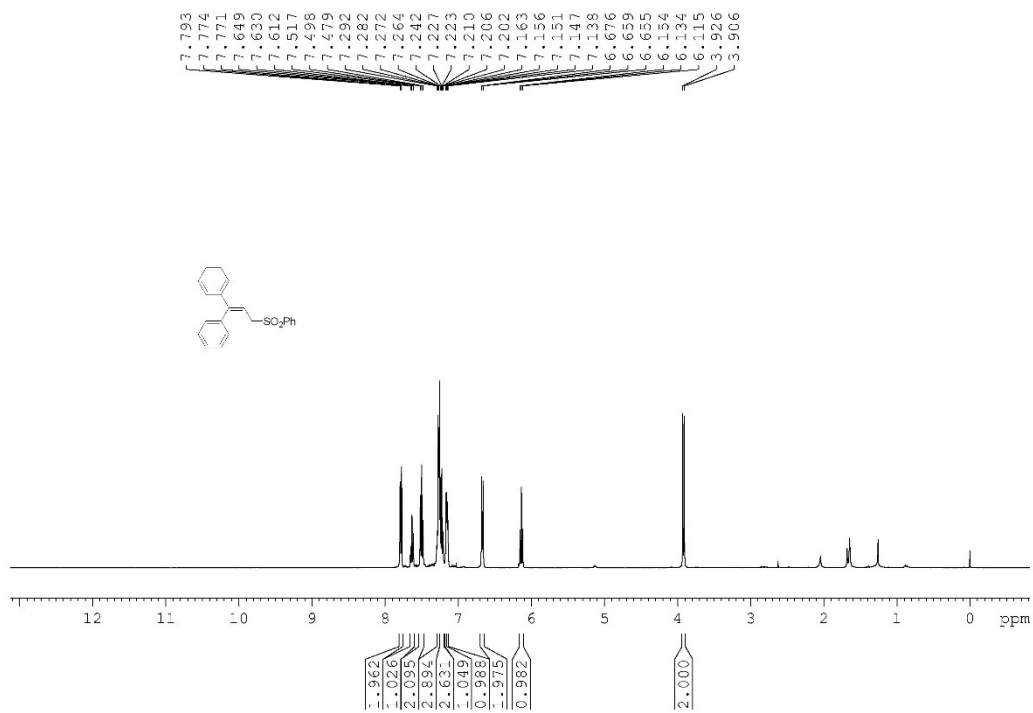

**Figure S4.** <sup>1</sup>H NMR spectrum of the adduct **5**

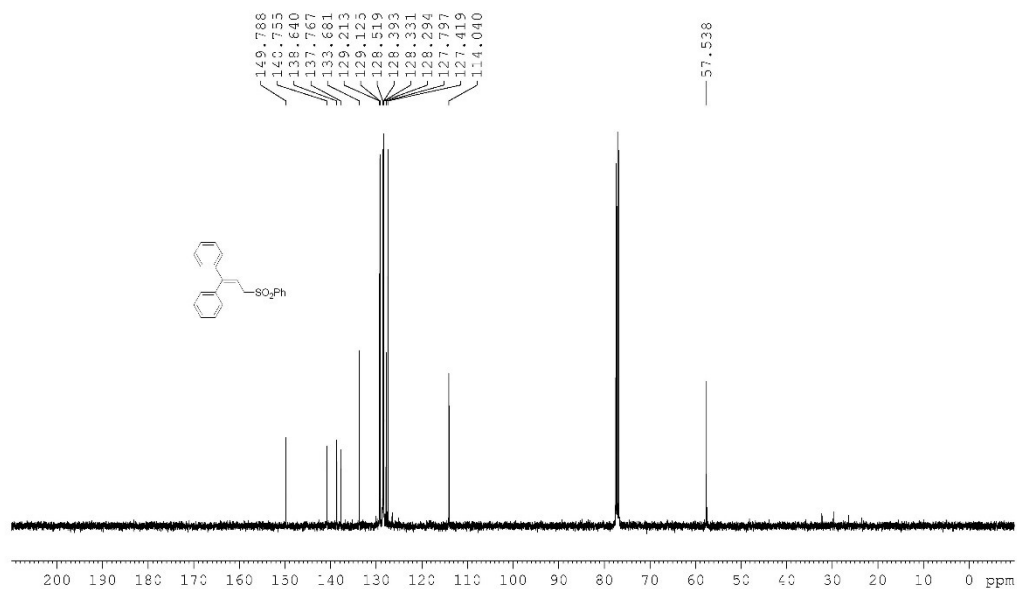

**Figure S5.** <sup>13</sup>C NMR spectrum of the adduct **5**

## 5. Light ON/OFF experiment

Under standard conditions, eight reactions were carried out, after 6 h, the blue led of one reaction was switched off, and was taken out for yield test, the remaining seven reactions were then continued under dark conditions for 6 h. Then one was taken out for yield test, the remaining six reactions were continued under blue light irradiation for 6 h and so on and so forth.

## 6. Luminescence quenching experiments

Emission intensities were recorded using an Edinburgh UK F4500 photoluminescence spectrometer from 400 nm to 700 nm. After irradiation of  $5 \times 10^{-5}$  M of Ir(ppy)<sub>3</sub> and different concentration of quencher in solvent (CH<sub>2</sub>Cl<sub>2</sub>) at 380 nm, its fluorescence was measured.

As shown in Figures S6-S8, the emission intensity of the excited state of photocatalyst Ir(ppy)<sub>3</sub> is decreased in the presence of **2a**. In contrast, when 2,6-lutidine solution is adopted there are few effects. The liner relationship between  $I_0/I$  and the different concentration of **2a**, 2,6-lutidine, was shown in Figure S8.

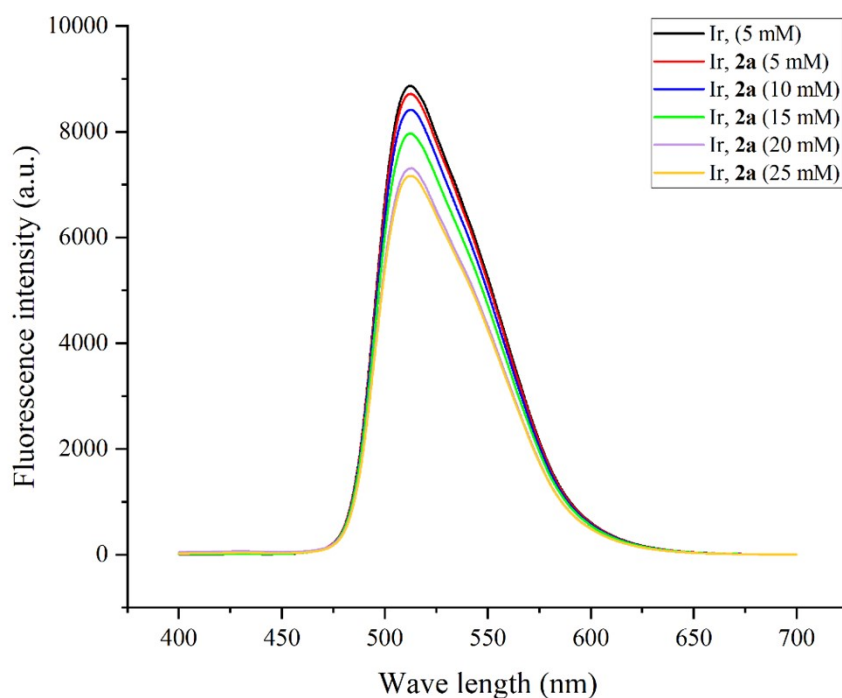

**Figure S6.** Fluorescence quenching of Ir(ppy)<sub>3</sub> with **2a**

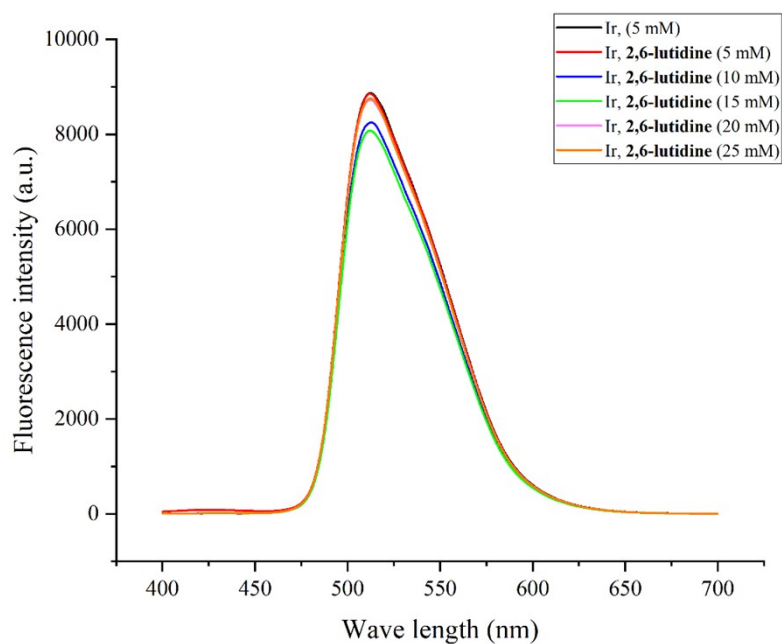

**Figure.S7.** Fluorescence quenching of Ir(ppy)<sub>3</sub> with 2,6-lutidine.

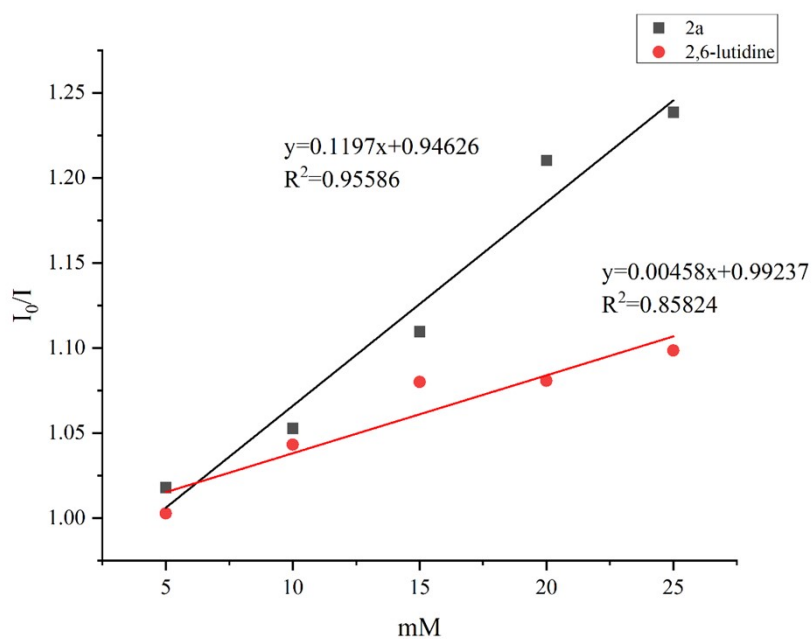

**Figure S8.** The liner relationship between  $I_0/I$  ( $I_0$  and  $I$  are the florescence intensities of Ir(ppy)<sub>3</sub> before and after adding the **2a** and 2,6-lutidine with various concentrations).



## 7. Characterization of the products

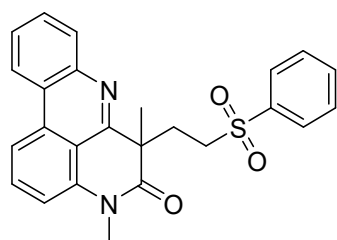

**4,6-dimethyl-6-(2-(phenylsulfonyl)ethyl)-4H-pyrido[4,3,2-g]phenanthridin-5(6H)-one (3a)** : 30.1 mg, 70% yield, yellow solid; mp 189–194 °C. <sup>1</sup>H NMR (400 MHz, Chloroform-*d*) δ 8.53 (d, *J* = 8.2 Hz, 1H), 8.29 (d, *J* = 8.3 Hz, 1H), 7.97 (d, *J* = 8.2 Hz, 1H), 7.88 – 7.80 (m, 3H), 7.76 (t, *J* = 6.9 Hz, 1H), 7.66 (dt, *J* = 12.0, 7.1 Hz, 2H), 7.52 (t, *J* = 7.7 Hz, 2H), 7.22 (d, *J* = 7.9 Hz, 1H), 3.56 (s, 3H), 3.21 – 3.09 (m, 1H), 3.02 (td, *J* = 13.5, 13.0, 3.9 Hz, 1H), 2.89 (td, *J* = 6.5 Hz, 1H), 2.66 (td, *J* = 12.4, 4.6 Hz, 1H), 1.65 (s, 3H). <sup>13</sup>C NMR (101 MHz, Chloroform-*d*) δ 172.5, 157.5, 144.7, 138.8, 138.4, 133.6, 133.4, 132.1, 130.0, 129.3, 129.2, 128.1, 127.1, 122.7, 116.5, 111.8, 111.0, 52.5, 50.4, 32.0, 30.0, 29.4. HRMS (ESI-TOF) *m/z* [M + H]<sup>+</sup> calcd for C<sub>25</sub>H<sub>23</sub>N<sub>2</sub>O<sub>3</sub>S 431.1424, found 431.1424.

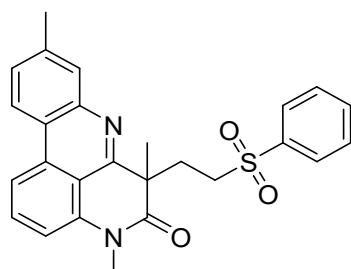

**4,6,9-trimethyl-6-(2-(phenylsulfonyl)ethyl)-4H-pyrido[4,3,2-g]phenanthridin-5(6H)-one (3b)** : 16.1 mg, 44% yield, bright yellow solid; mp 61–65 °C. <sup>1</sup>H NMR (400 MHz, Chloroform-*d*) δ 8.40 (d, *J* = 8.3 Hz, 1H), 8.23 (d, *J* = 8.3 Hz, 1H), 7.88 – 7.77 (m, 3H), 7.75 (s, 1H), 7.64 (d, *J* = 6.2 Hz, 1H), 7.57 – 7.44 (m, 3H), 7.17 (d, *J* = 7.9 Hz, 1H), 3.54 (s, 3H), 3.20 – 3.08 (m, 1H), 2.94 (dtd, *J* = 42.8, 12.6, 3.7 Hz, 2H), 2.70 – 2.62 (m, 1H), 1.63 (s, 3H). <sup>13</sup>C NMR (101 MHz, Chloroform-*d*) δ 172.6, 157.4, 144.8, 139.6, 138.8, 138.4, 133.5, 132.0, 129.4, 129.2, 128.9, 128.2, 128.0, 122.3, 120.4, 116.3, 111.5, 110.6, 52.5, 50.4, 31.9, 30.0, 29.5, 21.6. HRMS (ESI-TOF) *m/z* [M + H]<sup>+</sup> calcd for C<sub>26</sub>H<sub>25</sub>N<sub>2</sub>O<sub>3</sub>S 445.1580, found 445.1580.

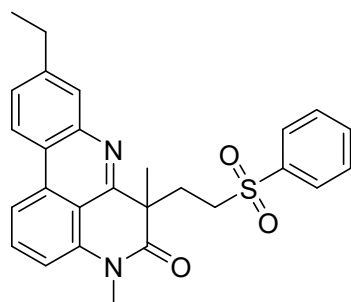

**9-ethyl-4,6-dimethyl-6-(2-(phenylsulfonyl)ethyl)-4H-pyrido[4,3,2-g]phenanthridin-5(6H)-one (3c)** : 22.8 mg, 50% yield, yellow oil. <sup>1</sup>H NMR (400 MHz, Chloroform-*d*) δ 8.42 (d, *J* = 8.4 Hz, 1H), 8.23 (d, *J* = 8.3 Hz, 1H), 7.91 – 7.76

(m, 3H), 7.74 (s, 1H), 7.69 – 7.61 (m, 1H), 7.52 (t,  $J = 8.5$  Hz, 3H), 7.17 (d,  $J = 7.9$  Hz, 1H), 3.54 (s, 3H), 3.21 – 3.08 (m, 1H), 3.08 – 2.95 (m, 1H), 2.89 (m,  $J = 12.6, 3.8$  Hz, 1H), 2.84 (d,  $J = 7.6$  Hz, 2H), 2.72 – 2.59 (m, 1H), 1.82 (h,  $J = 7.4$  Hz, 2H), 1.63 (s, 3H), 1.04 (t,  $J = 7.3$  Hz, 3H).  $^{13}\text{C}$  NMR (101 MHz, Chloroform-*d*)  $\delta$  172.6, 157.4, 145.8, 144.96, 138.8, 138.3, 133.5, 133.5, 132.0, 129.2, 128.2, 127.8, 122.4, 120.6, 116.3, 111.6, 110.5, 52.5, 50.4, 32.0, 30.0, 29.5, 28.9, 15.5. HRMS (ESI-TOF)  $m/z$   $[\text{M} + \text{H}]^+$  calcd for  $\text{C}_{27}\text{H}_{27}\text{N}_2\text{O}_3\text{S}$  459.1737, found 459.1739.

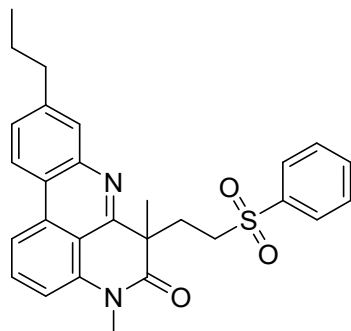

**4,6-dimethyl-6-(2-(phenylsulfonyl)ethyl)-9-propyl-4H-pyrido[4,3,2-g]phenanthridin-5(6H)-one (3d)** : 27.3 mg, 58% yield, yellow oil.  $^1\text{H}$  NMR (400 MHz, Chloroform-*d*)  $\delta$  8.42 (d,  $J = 8.4$  Hz, 1H), 8.23 (d,  $J = 8.3$  Hz, 1H), 7.84 (d,  $J = 8.2$  Hz, 2H), 7.80 (t,  $J = 8.1$  Hz, 1H), 7.74 (s, 1H), 7.64 (t,  $J = 7.5$  Hz, 1H), 7.52 (t,  $J = 7.8$  Hz, 3H), 7.17 (d,  $J = 7.9$  Hz, 1H), 3.54 (s, 3H), 3.22 – 3.09 (m, 1H), 3.07 – 2.96 (m, 1H), 2.89 (td,  $J = 12.6, 3.8$  Hz, 1H), 2.84 (t,  $J = 7.6$  Hz, 2H), 2.65 (td,  $J = 12.6, 4.7$  Hz, 1H), 1.82 (h,  $J = 7.4$  Hz, 2H), 1.63 (s, 3H), 1.04 (t,  $J = 7.3$  Hz, 3H).  $^{13}\text{C}$  NMR (101 MHz, Chloroform-*d*)  $\delta$  172.6, 157.3, 144.9, 144.3, 138.8, 138.3, 133.5, 133.5, 131.9, 129.2, 128.9, 128.2, 128.2, 122.3, 120.7, 116.3, 111.6, 110.5, 52.5, 50.4, 38.0, 31.9, 30.0, 29.5, 24.4, 14.0. HRMS (ESI-TOF)  $m/z$   $[\text{M} + \text{H}]^+$  calcd for  $\text{C}_{28}\text{H}_{29}\text{N}_2\text{O}_3\text{S}$  473.1893, found 473.1890.

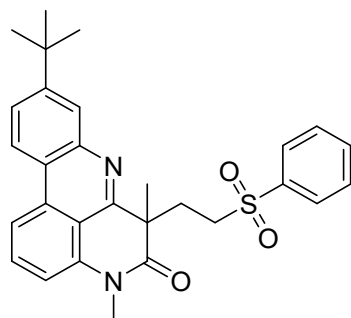

**9-(tert-butyl)-4,6-dimethyl-6-(2-(phenylsulfonyl)ethyl)-4H-pyrido[4,3,2-g]phenanthridin-5(6H)-one (3e)** : 37.1 mg, 76% yield, brown oil.  $^1\text{H}$  NMR (400 MHz, Chloroform-*d*)  $\delta$  8.44 (d,  $J = 8.7$  Hz, 1H), 8.24 (d,  $J = 8.3$  Hz, 1H), 7.93 (d,  $J = 2.1$  Hz, 1H), 7.90 – 7.83 (m, 2H), 7.80 (t,  $J = 8.1$  Hz, 1H), 7.75 (dd,  $J = 8.7, 2.1$  Hz, 1H), 7.64 (t,  $J = 7.5$  Hz, 1H), 7.52 (t,  $J = 7.7$  Hz, 2H), 7.17 (d,  $J = 7.9$  Hz, 1H), 3.54 (s, 3H), 3.21 – 3.08 (m, 1H), 3.08 – 2.99 (m, 1H), 2.86 (td,  $J = 12.6, 4.0$  Hz, 1H), 2.74 – 2.60 (m, 1H), 1.64 (s, 3H), 1.47 (s, 9H).  $^{13}\text{C}$  NMR (101 MHz, Chloroform-*d*)  $\delta$  172.6, 157.3, 152.8, 144.8, 138.8, 138.3, 133.6, 133.4, 132.0, 129.2, 128.1, 125.7, 125.5, 122.3, 120.4, 116.4, 111.6, 110.6, 52.5, 50.3, 35.1, 32.2, 31.4, 29.9, 29.5. HRMS (ESI-

TOF)  $m/z$   $[M + H]^+$  calcd for  $C_{29}H_{31}N_2O_3S$  487.2050, found 487.2050.

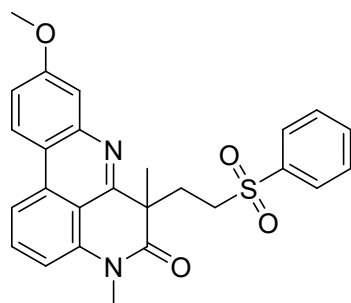

**9-methoxy-4,6-dimethyl-6-(2-(phenylsulfonyl)ethyl)-4H-pyrido[4,3,2-g]phenanthridin-5(6H)-one (3f)** : 28.9 mg, 63% yield, brilliant yellow oil.  $^1H$  NMR (400 MHz, Chloroform-*d*)  $\delta$  8.39 (d,  $J = 9.0$  Hz, 1H), 8.16 (d,  $J = 8.3$  Hz, 1H), 7.85 (d,  $J = 9.7$  Hz, 2H), 7.78 (t,  $J = 8.1$  Hz, 1H), 7.63 (t,  $J = 7.4$  Hz, 1H), 7.52 (t,  $J = 7.7$  Hz, 2H), 7.38 (s, 1H), 7.29 (dd,  $J = 9.0, 2.7$  Hz, 1H), 7.12 (d,  $J = 7.9$  Hz, 1H), 4.01 (s, 3H), 3.53 (s, 3H), 3.20 – 3.07 (m, 1H), 2.95 (dtd,  $J = 49.2, 12.5, 4.0$  Hz, 2H), 2.65 (td,  $J = 12.5, 4.7$  Hz, 1H), 1.64 (s, 3H).  $^{13}C$  NMR (101 MHz, Chloroform-*d*)  $\delta$  172.5, 160.6, 157.9, 146.5, 138.8, 138.4, 133.6, 133.5, 132.1, 129.2, 128.1, 123.7, 118.5, 116.8, 116.0, 111.0, 109.9, 109.4, 52.5, 50.3, 32.0, 29.9, 29.5. HRMS (ESI-TOF)  $m/z$   $[M + H]^+$  calcd for  $C_{26}H_{25}N_2O_4S$  461.1530, found 461.1535.

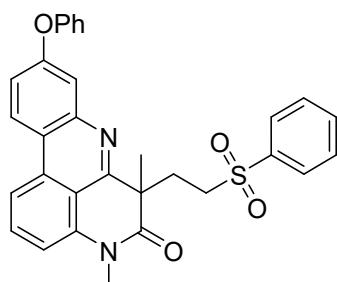

**4,6-dimethyl-9-phenoxy-6-(2-(phenylsulfonyl)ethyl)-4H-pyrido[4,3,2-g]phenanthridin-5(6H)-one (3g)** : 27.5 mg, 53% yield, yellow oil.  $^1H$  NMR (400 MHz, Chloroform-*d*)  $\delta$  8.47 (d,  $J = 9.0$  Hz, 1H), 8.19 (d,  $J = 8.3$  Hz, 1H), 7.81 (t,  $J = 8.3$  Hz, 3H), 7.55 – 7.38 (m, 6H), 7.34 (d,  $J = 2.5$  Hz, 1H), 7.26 (d,  $J = 14.9$  Hz, 1H), 7.21 – 7.12 (m, 3H), 3.54 (s, 3H), 3.17 – 3.07 (m, 1H), 3.03 – 2.92 (m, 1H), 2.73 (td,  $J = 12.5, 3.9$  Hz, 1H), 2.63 (td,  $J = 12.5, 4.8$  Hz, 1H), 1.58 (s, 3H).  $^{13}C$  NMR (101 MHz, Chloroform-*d*)  $\delta$  172.4, 158.7, 158.4, 156.3, 146.2, 138.6, 138.4, 133.6, 133.4, 132.3, 130.2, 129.1, 128.1, 124.3, 124.2, 120.0, 119.6, 118.4, 116.2, 115.8, 111.3, 52.4, 50.4, 31.9, 30.0, 29.6. HRMS (ESI-TOF)  $m/z$   $[M + H]^+$  calcd for  $C_{31}H_{27}N_2O_4S$  523.1686, found 523.1681.

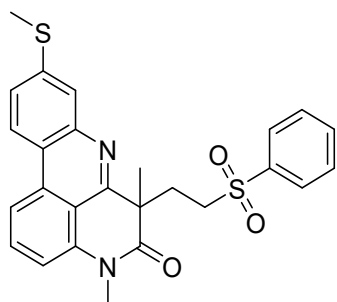

**4,6-dimethyl-9-(methylthio)-6-(2-(phenylsulfonyl)ethyl)-4H-pyrido[4,3,2-gh]phenanthridin-5(6H)-one (3h)** : 35 mg, 74% yield, orange-yellow oil. <sup>1</sup>H NMR (400 MHz, Chloroform-*d*) δ 8.36 (d, *J* = 8.7 Hz, 1H), 8.18 (d, *J* = 8.3 Hz, 1H), 7.86 – 7.76 (m, 3H), 7.70 (d, *J* = 2.0 Hz, 1H), 7.68 – 7.59 (m, 1H), 7.56 – 7.46 (m, 3H), 7.16 (d, *J* = 7.9 Hz, 1H), 3.54 (s, 3H), 3.19 – 3.07 (m, 1H), 3.06 – 2.93 (m, 1H), 2.86 (td, *J* = 12.6, 3.9 Hz, 1H), 2.66 (s, 4H), 1.63 (s, 3H). <sup>13</sup>C NMR (101 MHz, Chloroform-*d*) δ 172.5, 158.2, 145.3, 140.9, 138.8, 138.4, 133.6, 133.4, 132.2, 129.2, 128.1, 125.8, 124.7, 122.7, 119.8, 116.2, 111.5, 110.6, 52.5, 50.4, 32.0, 30.0, 29.5, 15.3. HRMS (ESI-TOF) *m/z* [M + H]<sup>+</sup> calcd for C<sub>26</sub>H<sub>25</sub>N<sub>2</sub>O<sub>3</sub>S<sub>2</sub> 477.1301, found 477.1304.

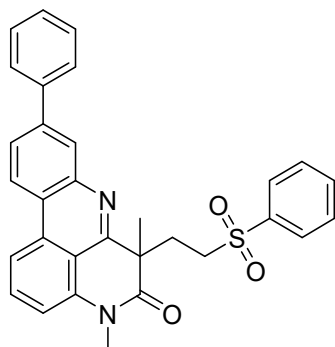

**4,6-dimethyl-9-phenyl-6-(2-(phenylsulfonyl)ethyl)-4H-pyrido[4,3,2-gh]phenanthridin-5(6H)-one (3i)** : 27.9 mg, 55% yield, yellow oil. <sup>1</sup>H NMR (400 MHz, Chloroform-*d*) δ 8.55 (d, *J* = 8.6 Hz, 1H), 8.27 (d, *J* = 8.3 Hz, 1H), 8.15 (d, *J* = 1.9 Hz, 1H), 7.92 (dd, *J* = 8.5, 2.0 Hz, 1H), 7.88 – 7.74 (m, 5H), 7.62 – 7.40 (m, 6H), 7.21 (d, *J* = 7.9 Hz, 1H), 3.55 (s, 3H), 3.24 – 3.11 (m, 1H), 3.09 – 2.96 (m, 1H), 2.90 (td, *J* = 12.6, 3.7 Hz, 1H), 2.69 (td, *J* = 12.5, 4.7 Hz, 1H), 1.65 (s, 3H). <sup>13</sup>C NMR (101 MHz, Chloroform-*d*) δ 172.5, 158.0, 145.1, 142.0, 140.0, 138.9, 138.5, 133.6, 133.3, 132.2, 129.2, 129.0, 128.2, 128.0, 127.8, 127.4, 126.2, 123.1, 121.8, 116.5, 111.8, 111.0, 52.5, 50.5, 31.9, 30.0, 29.6. HRMS (ESI-TOF) *m/z* [M + H]<sup>+</sup> calcd for C<sub>31</sub>H<sub>27</sub>N<sub>2</sub>O<sub>3</sub>S 507.1737, found 507.1737.

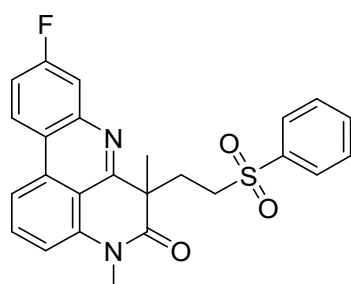

**9-fluoro-4,6-dimethyl-6-(2-(phenylsulfonyl)ethyl)-4H-pyrido[4,3,2-gh]phenanthridin-5(6H)-one (3j)** : 29.2 mg, 65% yield, yellow oil. <sup>1</sup>H NMR (400 MHz, Chloroform-*d*) δ 8.49 (dd, *J* = 9.1, 5.8 Hz, 1H), 8.20 (d, *J* = 8.3 Hz, 1H), 7.90 – 7.80 (m, 3H), 7.71 – 7.63 (m, 1H), 7.54 (t, *J* = 7.7 Hz, 3H), 7.47 – 7.37 (m, 1H), 7.21 (d, *J* = 7.9 Hz, 1H), 3.55 (s, 3H), 3.21 – 3.09 (m, 1H), 3.02 – 2.90 (m, 1H), 2.84 (td, *J* = 12.6, 3.7 Hz, 1H), 2.67 (td, *J* = 14.1, 13.3, 5.5 Hz, 1H), 1.63 (s, 3H). <sup>13</sup>C NMR (101 MHz, Chloroform-*d*) δ 172.4, 163.0 (d, *J* = 250.5 Hz), 159.1, 146.0 (d, *J* = 12.0 Hz), 138.7, 138.5, 133.7, 133.3, 132.6, 129.2, 128.2, 124.6 (d, *J* = 9.6 Hz), 119.5 (d, *J* = 1.5

Hz), 116.3 (d,  $J = 24.2$  Hz), 116.2, 114.3 (d,  $J = 20.5$  Hz), 111.5, 110.9, 52.5, 50.5, 31.9, 30.0, 29.6.  $^{19}\text{F}$  NMR (376 MHz, Chloroform- $d$ )  $\delta$  -111.01. HRMS (ESI-TOF)  $m/z$  [ $M + H$ ] $^+$  calcd for  $\text{C}_{25}\text{H}_{22}\text{FN}_2\text{O}_3\text{S}$  449.1330, found 449.1332.

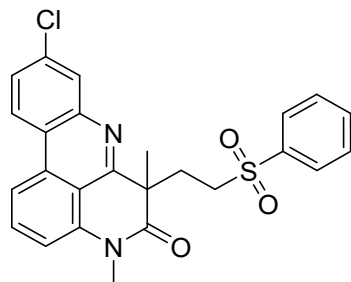

**9-chloro-4,6-dimethyl-6-(2-(phenylsulfonyl)ethyl)-4H-pyrido[4,3,2-gh]phenanthridin-5(6H)-one (3k)** : 16.1 mg, 35% yield, yellow oil.  $^1\text{H}$  NMR (400 MHz, Chloroform- $d$ )  $\delta$  8.43 (d,  $J = 8.8$  Hz, 1H), 8.21 (d,  $J = 8.3$  Hz, 1H), 7.89 – 7.79 (m, 4H), 7.69 (t,  $J = 7.5$  Hz, 1H), 7.64 – 7.58 (m, 1H), 7.54 (t,  $J = 7.8$  Hz, 2H), 7.23 (d,  $J = 7.9$  Hz, 1H), 3.55 (s, 3H), 3.21 – 3.10 (m, 1H), 2.97 – 2.89 (m, 1H), 2.85 (td,  $J = 12.6, 3.5$  Hz, 1H), 2.68 (td,  $J = 12.5, 4.9$  Hz, 1H), 1.62 (s, 3H).  $^{13}\text{C}$  NMR (101 MHz, Chloroform- $d$ )  $\delta$  172.3, 159.0, 145.2, 138.7, 138.6, 135.0, 133.7, 133.1, 132.6, 129.2, 129.1, 128.2, 127.7, 123.9, 121.2, 116.3, 111.8, 111.3, 52.5, 50.5, 31.9, 30.0, 29.7. HRMS (ESI-TOF)  $m/z$  [ $M + H$ ] $^+$  calcd for  $\text{C}_{25}\text{H}_{22}\text{ClN}_2\text{O}_3\text{S}$  465.1034, found 465.1038.

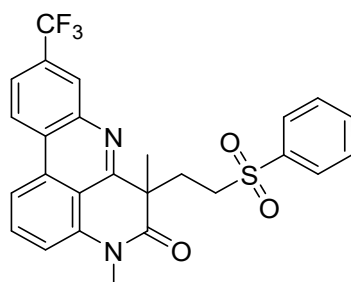

**4,6-dimethyl-6-(2-(phenylsulfonyl)ethyl)-9-(trifluoromethyl)-4H-pyrido[4,3,2-gh]phenanthridin-5(6H)-one (3l)** : 27.8 mg, 57% yield, yellow oil.  $^1\text{H}$  NMR (400 MHz, Chloroform- $d$ )  $\delta$  8.62 (d,  $J = 8.6$  Hz, 1H), 8.30 (d,  $J = 8.8$  Hz, 1H), 8.09 (s, 1H), 7.91 (t,  $J = 8.1$  Hz, 1H), 7.87 – 7.80 (m, 3H), 7.74 – 7.64 (m, 1H), 7.60 – 7.50 (m, 2H), 7.31 (d,  $J = 8.0$  Hz, 1H), 3.57 (s, 3H), 3.26 – 3.11 (m, 1H), 2.97 – 2.80 (m, 2H), 2.72 (td,  $J = 12.5, 5.0$  Hz, 1H), 1.62 (s, 3H).  $^{13}\text{C}$  NMR (101 MHz, Chloroform- $d$ )  $\delta$  172.2, 159.4, 143.9, 138.7, 138.6, 133.7, 132.8, 132.7, 131.0 (q,  $J = 33$  Hz), 129.2, 128.2, 127.4 (q,  $J = 4.4$  Hz), 125.4, 124.0 (q,  $J = 272.7$  Hz), 123.7, 122.8 (q,  $J = 3.7$  Hz), 116.7, 112.4, 112.2, 52.4, 50.6, 31.8, 30.0, 29.9.  $^{19}\text{F}$  NMR (376 MHz, Chloroform- $d$ )  $\delta$  -62.26. HRMS (ESI-TOF)  $m/z$  [ $M + H$ ] $^+$  calcd for  $\text{C}_{26}\text{H}_{22}\text{F}_2\text{N}_3\text{O}_2\text{S}$  499.1298, found 499.1301.

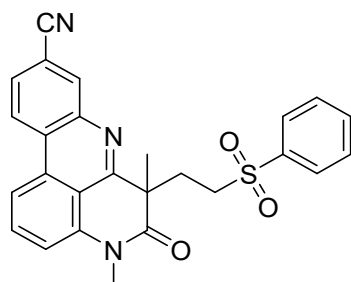

**4,6-dimethyl-6-(2-(phenylsulfonyl)ethyl)-4H-pyrido[4,3,2-gh]phenanthridin-5(6H)-**

**one (3m)** : 28 mg, 62% yield, pale yellow solid; mp 150–155 °C. <sup>1</sup>H NMR (400 MHz, Chloroform-*d*) δ 8.59 (d, *J* = 8.5 Hz, 1H), 8.28 (d, *J* = 8.3 Hz, 1H), 8.18 (d, *J* = 1.7 Hz, 1H), 7.94 (t, *J* = 8.1 Hz, 1H), 7.87 – 7.78 (m, 3H), 7.72 (t, *J* = 7.5 Hz, 1H), 7.56 (t, *J* = 7.8 Hz, 2H), 7.34 (d, *J* = 8.0 Hz, 1H), 3.57 (s, 3H), 3.25 – 3.07 (m, 1H), 2.98 – 2.78 (m, 2H), 2.76 – 2.61 (m, 1H), 1.64 (s, 3H). <sup>13</sup>C NMR (101 MHz, Chloroform-*d*) δ 172.1, 160.2, 143.9, 138.8, 138.7, 135.0, 133.8, 133.1, 132.4, 129.3, 128.3, 128.2, 126.0, 124.0, 118.4, 116.8, 112.7, 112.6, 112.5, 52.5, 50.6, 31.8, 30.1, 29.6. HRMS (ESI-TOF) *m/z* [M + H]<sup>+</sup> calcd for C<sub>26</sub>H<sub>22</sub>N<sub>3</sub>O<sub>3</sub>S 456.1376, found 456.1379.

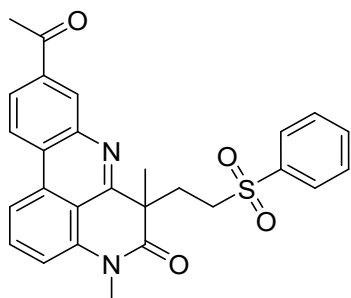

**9-acetyl-4,6-dimethyl-6-(2-(phenylsulfonyl)ethyl)-4H-pyrido[4,3,2-g]phenanthridin-5(6H)-one (3n)** : 17.9 mg, 38% yield, pale yellow oil. <sup>1</sup>H NMR (400 MHz, Chloroform-*d*) δ 8.58 (d, *J* = 8.6 Hz, 1H), 8.52 (d, *J* = 1.9 Hz, 1H), 8.31 (d, *J* = 8.3 Hz, 1H), 8.24 (dd, *J* = 8.6, 1.9 Hz, 1H), 7.96 – 7.81 (m, 3H), 7.67 (t, *J* = 7.5 Hz, 1H), 7.55 (t, *J* = 7.8 Hz, 2H), 7.30 (d, *J* = 7.9 Hz, 1H), 3.57 (s, 3H), 3.21 – 3.10 (m, 1H), 2.82 (s, 3H), 2.68 (td, *J* = 12.6, 4.6 Hz, 1H), 1.66 (s, 3H). <sup>13</sup>C NMR (101 MHz, Chloroform-*d*) δ 197.8, 172.3, 158.9, 144.3, 138.7, 138.6, 137.4, 133.7, 132.8, 132.6, 131.3, 129.2, 128.2, 126.1, 125.3, 123.2, 117.0, 112.4, 112.2, 52.5, 50.5, 31.9, 30.0, 29.5, 26.9. HRMS (ESI-TOF) *m/z* [M + H]<sup>+</sup> calcd for C<sub>27</sub>H<sub>25</sub>N<sub>2</sub>O<sub>4</sub>S 473.1530, found 473.1529.

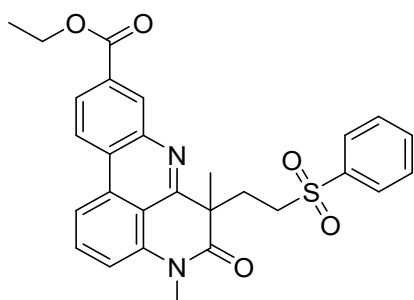

**ethyl 4,6-dimethyl-5-oxo-6-(2-(phenylsulfonyl)ethyl)-5,6-dihydro-4H-pyrido[4,3,2-g]phenanthridine-9-carboxylate (3o)** : 26.8 mg, 55% yield, orange-yellow solid; mp 197–201 °C. <sup>1</sup>H NMR (400 MHz, Chloroform-*d*) δ 8.60 – 8.49 (m, 2H), 8.34 – 8.22 (m, 2H), 7.95 – 7.81 (m, 3H), 7.73 – 7.63 (m, 1H), 7.55 (t, *J* = 7.8 Hz, 2H), 7.29 (d, *J* = 7.9 Hz, 1H), 4.52 (q, *J* = 7.1 Hz, 2H), 3.57 (s, 3H), 3.23 – 3.10 (m, 1H), 3.06 – 2.92 (m, 1H), 2.86 (td, *J* = 12.6, 3.7 Hz, 1H), 2.69 (td, *J* = 12.6, 4.7 Hz, 1H), 1.63 (s, 3H), 1.53 (t, *J* = 7.1 Hz, 3H). <sup>13</sup>C NMR (101 MHz, Chloroform-*d*) δ 172.3, 166.3, 158.7, 144.1, 138.6, 138.6, 133.7, 132.8, 132.5, 131.9, 131.0, 129.2, 128.1, 127.0, 125.9, 122.9, 116.9, 112.4, 112.1, 61.5, 52.4, 50.5, 30.0, 29.7, 14.5. HRMS (ESI-TOF) *m/z* [M + H]<sup>+</sup> calcd for C<sub>28</sub>H<sub>27</sub>N<sub>2</sub>O<sub>5</sub>S 503.1653, found 503.1652.

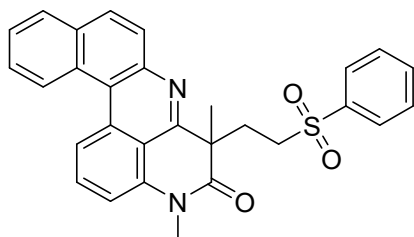

**4,6-dimethyl-6-(2-(phenylsulfonyl)ethyl)-4H-benzo[a]pyrido[4,3,2-gh]phenanthridin-5(6H)-one (3p)** : 30.2 mg, 63% yield, yellow oil.  $^1\text{H}$  NMR (400 MHz, Chloroform-*d*)  $\delta$  9.03 (d,  $J = 8.3$  Hz, 1H), 8.77 (d,  $J = 8.6$  Hz, 1H), 8.04 (t,  $J = 8.1$  Hz, 2H), 7.89 – 7.79 (m, 4H), 7.77 – 7.58 (m, 3H), 7.50 (t,  $J = 7.8$  Hz, 2H), 7.23 (d,  $J = 7.9$  Hz, 1H), 3.59 (s, 3H), 3.22 – 3.11 (m, 1H), 3.10 – 2.99 (m, 1H), 2.91 (td,  $J = 12.6, 3.8$  Hz, 1H), 2.70 (td,  $J = 12.5, 4.6$  Hz, 1H), 1.66 (s, 3H).  $^{13}\text{C}$  NMR (101 MHz, Chloroform-*d*)  $\delta$  172.5, 156.7, 144.8, 138.8, 138.1, 133.6, 133.4, 133.3, 131.7, 130.2, 129.7, 129.2, 128.9, 128.2, 128.1, 127.5, 126.8, 126.6, 121.2, 119.4, 113.1, 110.2, 52.6, 50.1, 32.1, 30.1, 29.4. HRMS (ESI-TOF)  $m/z$   $[\text{M} + \text{H}]^+$  calcd for  $\text{C}_{29}\text{H}_{25}\text{N}_2\text{O}_3\text{S}$  481.1580, found 481.1580.

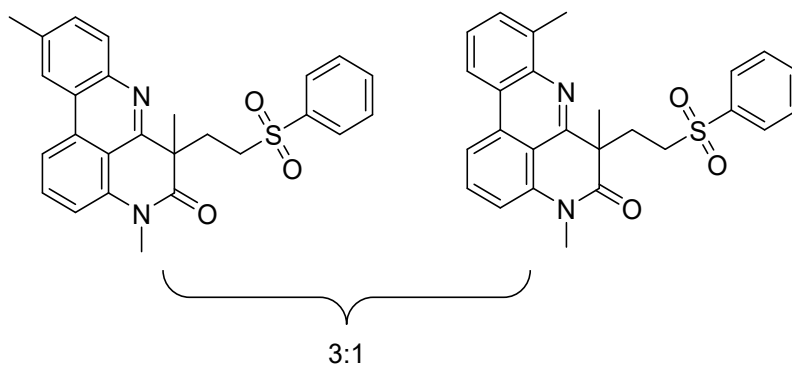

**4,6,10-trimethyl-6-(2-(phenylsulfonyl)ethyl)-4H-pyrido[4,3,2-gh]phenanthridin-5(6H)-one and 4,6,8-trimethyl-6-(2-(phenylsulfonyl)ethyl)-4H-pyrido[4,3,2-gh]phenanthridin-5(6H)-one (3q:3q' = 3:1)** : 19.8 mg, 45% yield, pale yellow solid; mp 158–161 °C.  $^1\text{H}$  NMR (400 MHz, Chloroform-*d*)  $\delta$  8.38 (d,  $J = 9.7$  Hz, 1H), 8.27 (d,  $J = 8.4$  Hz, 1H), 7.87 – 7.80 (m, 3H), 7.65 – 7.58 (m, 2H), 7.56 (d,  $J = 7.2$  Hz, 1H), 7.55 – 7.45 (m, 2H), 7.19 (d,  $J = 7.9$  Hz, 1H), 3.55 (s, 3H), 3.21 – 3.08 (td, 1H), 3.06 – 2.90 (m, 2H), 2.70 (td, 3H), 2.69 – 2.64 (m, 1H), 1.64 (s, 3H).  $^{13}\text{C}$  NMR (101 MHz, Chloroform-*d*)  $\delta$  172.7, 155.9, 143.4, 138.9, 138.3, 137.9, 133.6, 131.8, 131.0, 129.9, 129.2, 128.1, 126.7, 122.5, 120.3, 116.8, 111.6, 110.7, 52.7, 50.6, 32.0, 30.1, 29.9, 18.2. HRMS (ESI-TOF)  $m/z$   $[\text{M} + \text{H}]^+$  calcd for  $\text{C}_{26}\text{H}_{25}\text{N}_2\text{O}_3\text{S}$  445.1580, found 445.1583.

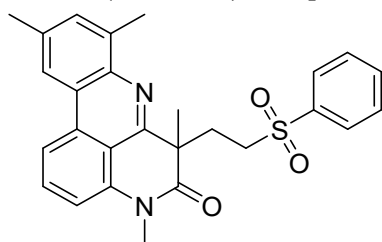

**4,6,8,10-tetramethyl-6-(2-(phenylsulfonyl)ethyl)-4H-pyrido[4,3,2-gh]phenanthridin-5(6H)-one (3r)** : 27.2 mg, 60% yield, orange-yellow solid; mp 155–158 °C.  $^1\text{H}$  NMR (400 MHz, Chloroform-*d*)  $\delta$  8.25 (d,  $J = 8.3$  Hz, 1H), 8.15 (s, 1H),

7.83 (d,  $J = 8.1$  Hz, 2H), 7.78 (t,  $J = 8.1$  Hz, 1H), 7.60 (d,  $J = 7.5$  Hz, 1H), 7.49 (t,  $J = 7.7$  Hz, 2H), 7.45 (s, 1H), 7.17 (d,  $J = 7.8$  Hz, 1H), 3.54 (s, 3H), 3.14 (td,  $J = 13.0, 4.3$  Hz, 1H), 3.07 – 2.88 (m, 2H), 2.67 (td, 1H), 2.66 (s, 3H), 2.58 (s, 3H), 1.63 (s, 3H).  $^{13}\text{C}$  NMR (101 MHz, Chloroform-*d*)  $\delta$  172.8, 154.8, 141.8, 139.0, 138.3, 137.5, 136.6, 133.6, 133.5, 131.8, 131.5, 129.2, 128.1, 122.4, 119.8, 116.7, 111.7, 110.6, 52.7, 50.5, 32.0, 30.1, 29.9, 22.0, 18.1. HRMS (ESI-TOF)  $m/z$   $[\text{M} + \text{H}]^+$  calcd for  $\text{C}_{27}\text{H}_{27}\text{N}_2\text{O}_3\text{S}$  459.1737, found 459.1739.

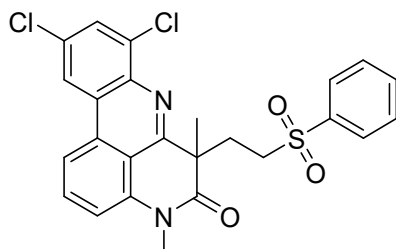

**8,10-dichloro-4,6-dimethyl-6-(2-(phenylsulfonyl)ethyl)-4H-pyrido[4,3,2-gh]phenanthridin-5(6H)-one (3s)** : 23.6 mg, 47% yield, orange-yellow solid; mp 204–207 °C.  $^1\text{H}$  NMR (400 MHz, Chloroform-*d*)  $\delta$  8.39 (d,  $J = 2.2$  Hz, 1H), 8.17 (d,  $J = 8.3$  Hz, 1H), 7.89 (t,  $J = 8.1$  Hz, 1H), 7.85 (s, 1H), 7.82 (dd,  $J = 5.7, 1.9$  Hz, 2H), 7.62 (t,  $J = 7.5$  Hz, 1H), 7.51 (t,  $J = 7.8$  Hz, 2H), 7.29 (d,  $J = 7.9$  Hz, 1H), 3.57 (s, 3H), 3.29 – 3.17 (m, 1H), 3.12 (dd,  $J = 12.2, 4.4$  Hz, 1H), 2.84 (td,  $J = 12.5, 4.3$  Hz, 1H), 2.67 (td,  $J = 12.6, 4.4$  Hz, 1H), 1.66 (s, 3H).  $^{13}\text{C}$  NMR (101 MHz, Chloroform-*d*)  $\delta$  172.3, 158.8, 139.6, 138.8, 138.7, 135.6, 133.6, 132.9, 132.4, 132.3, 129.9, 129.2, 128.1, 124.9, 121.1, 116.6, 112.1, 112.1, 52.4, 50.6, 32.2, 30.1, 29.3. HRMS (ESI-TOF)  $m/z$   $[\text{M} + \text{H}]^+$  calcd for  $\text{C}_{25}\text{H}_{21}\text{Cl}_2\text{N}_2\text{O}_3\text{S}$  499.0644, found 499.0648.

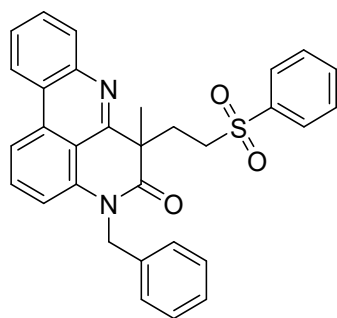

**4-benzyl-6-methyl-6-(2-(phenylsulfonyl)ethyl)-4H-pyrido[4,3,2-gh]phenanthridin-5(6H)-one (3t)** : 31.4 mg, 62% yield, yellow oil.  $^1\text{H}$  NMR (400 MHz, Chloroform-*d*)  $\delta$  8.49 (d,  $J = 9.6$  Hz, 1H), 8.23 (d,  $J = 8.3$  Hz, 1H), 7.95 (d,  $J = 8.3$  Hz, 1H), 7.86 (d,  $J = 8.2$  Hz, 2H), 7.74 (t,  $J = 7.6$  Hz, 1H), 7.71 – 7.62 (m, 3H), 7.53 (t,  $J = 7.7$  Hz, 2H), 7.32 (d,  $J = 7.1$  Hz, 2H), 7.27 (t, 3H), 7.12 (d,  $J = 8.0$  Hz, 1H), 5.52 (d,  $J = 16.2$  Hz, 1H), 5.23 (d,  $J = 16.0$  Hz, 1H), 3.29 – 3.17 (m, 1H), 3.17 – 3.07 (m, 1H), 2.96 (td,  $J = 12.5, 4.0$  Hz, 1H), 2.72 (td,  $J = 12.5, 4.7$  Hz, 1H), 1.74 (s, 3H).  $^{13}\text{C}$  NMR (101 MHz, Chloroform-*d*)  $\delta$  172.8, 157.3, 144.7, 138.8, 137.5, 136.1, 133.6, 133.6, 132.0, 123.0, 129.3, 129.2, 129.0, 128.2, 127.5, 127.1, 126.3, 122.8, 122.5, 116.6, 112.1, 112.0, 52.5, 50.6, 46.3, 31.6, 29.7. HRMS (ESI-TOF)  $m/z$   $[\text{M} + \text{H}]^+$  calcd for  $\text{C}_{31}\text{H}_{27}\text{N}_2\text{O}_3\text{S}$  507.1737, found 507.1738.



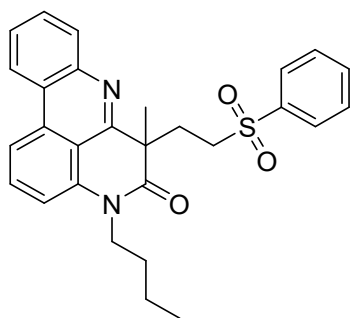

**4-butyl-6-methyl-6-(2-(phenylsulfonyl)ethyl)-4H-pyrido[4,3,2-g]phenanthridin-5(6H)-one (3u)** : 24.9 mg, 53% yield, yellow oil.  $^1\text{H}$  NMR (400 MHz, Chloroform-*d*)  $\delta$  8.51 (d,  $J = 8.8$  Hz, 1H), 8.26 (d,  $J = 8.2$  Hz, 1H), 7.93 (d,  $J = 8.1$  Hz, 1H), 7.89 – 7.78 (m, 3H), 7.78 – 7.71 (m, 1H), 7.70 – 7.60 (m, 2H), 7.52 (d,  $J = 15.6$  Hz, 2H), 7.20 (d,  $J = 8.0$  Hz, 1H), 4.12 (ddt,  $J = 34.7, 14.4, 7.7$  Hz, 2H), 3.23 – 3.08 (m, 1H), 3.08 – 2.96 (m, 1H), 2.86 (td,  $J = 12.6, 3.9$  Hz, 1H), 2.64 (td,  $J = 12.5, 4.6$  Hz, 1H), 1.69 (dq,  $J = 15.5, 7.6$  Hz, 2H), 1.62 (s, 3H), 1.46 (h,  $J = 7.3$  Hz, 2H), 1.01 (t,  $J = 7.3$  Hz, 3H).  $^{13}\text{C}$  NMR (101 MHz, Chloroform-*d*)  $\delta$  172.2, 157.6, 138.8, 137.4, 135.2, 133.7, 133.6, 132.1, 129.9, 129.2, 129.2, 128.1, 127.0, 122.8, 122.5, 116.3, 112.1, 111.0, 52.46, 50.3, 42.4, 31.9, 29.4, 28.9, 20.3, 13.9. HRMS (ESI-TOF)  $m/z$   $[\text{M} + \text{H}]^+$  calcd for  $\text{C}_{28}\text{H}_{29}\text{N}_2\text{O}_3\text{S}$  473.1893, found 473.1895.

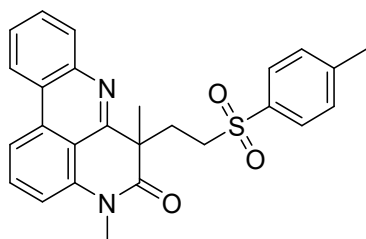

**4,6-dimethyl-6-(2-(tosylethyl)-4-methylphenylsulfonyl)-4H-pyrido[4,3,2-g]phenanthridin-5(6H)-one (3w)** : 17.4 mg, 39% yield, yellow oil.  $^1\text{H}$  NMR (400 MHz, Chloroform-*d*)  $\delta$  8.52 (d,  $J = 9.7$  Hz, 1H), 8.28 (d,  $J = 8.3$  Hz, 1H), 7.94 (d,  $J = 8.2$  Hz, 1H), 7.83 (t,  $J = 8.1$  Hz, 1H), 7.78 – 7.72 (m, 1H), 7.72 – 7.61 (m, 3H), 7.29 (d,  $J = 8.0$  Hz, 2H), 7.21 (d,  $J = 7.9$  Hz, 1H), 3.55 (s, 3H), 3.21 – 3.05 (m, 1H), 3.03 – 2.91 (m, 1H), 2.85 (td,  $J = 12.6, 3.8$  Hz, 1H), 2.63 (td,  $J = 12.5, 4.6$  Hz, 1H), 2.45 (s, 3H), 1.64 (s, 3H).  $^{13}\text{C}$  NMR (101 MHz, Chloroform-*d*)  $\delta$  172.6, 157.5, 144.7, 144.4, 138.4, 135.8, 133.4, 132.0, 130.0, 129.8, 129.2, 128.1, 127.0, 122.7, 122.5, 116.4, 111.8, 111.0, 52.5, 50.4, 32.3, 30.0, 29.3, 21.7. HRMS (ESI-TOF)  $m/z$   $[\text{M} + \text{H}]^+$  calcd for  $\text{C}_{26}\text{H}_{25}\text{N}_2\text{O}_3\text{S}$  445.1580, found 445.1580.

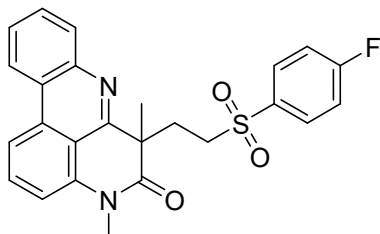

**6-(2-((4-fluorophenyl)sulfonyl)ethyl)-4,6-dimethyl-4H-pyrido[4,3,2-g]phenanthridin-5(6H)-one (3x)** : 23.7 mg, 53% yield, yellow solid; mp 192–197 °C.  $^1\text{H}$  NMR (400 MHz, Chloroform-*d*)  $\delta$  8.53 (d,  $J = 7.6$  Hz, 1H), 8.29 (d,  $J = 8.3$  Hz, 1H), 7.99 (d,  $J = 7.7$  Hz, 1H), 7.92 – 7.80 (m, 3H), 7.80 – 7.72 (m, 1H), 7.69 (t,  $J = 7.2$

Hz, 1H), 7.23 (d,  $J = 7.9$  Hz, 1H), 7.17 (t,  $J = 8.4$  Hz, 2H), 3.56 (s, 3H), 3.24 – 3.09 (m, 1H), 3.09 – 2.96 (m, 1H), 2.96 – 2.84 (m, 1H), 2.66 (td,  $J = 12.4, 4.6$  Hz, 1H), 1.66 (s, 3H).  $^{13}\text{C}$  NMR (101 MHz, Chloroform-*d*)  $\delta$  172.4, 165.8 (d,  $J = 255.7$  Hz), 157.5, 138.5, 134.8 (d,  $J = 2.9$  Hz), 133.5, 132.4, 131.0 (d,  $J = 9.7$  Hz), 129.7, 129.5, 127.2, 122.8, 122.6, 116.6, 116.4 (d,  $J = 11.7$  Hz), 111.8, 111.1, 52.6, 50.3, 32.0, 30.0, 29.6.  $^{19}\text{F}$  NMR (376 MHz, Chloroform-*d*)  $\delta$  -103.80. HRMS (ESI-TOF)  $m/z$   $[\text{M} + \text{H}]^+$  calcd for  $\text{C}_{25}\text{H}_{22}\text{FN}_2\text{O}_3\text{S}$  449.1330, found 449.1330.

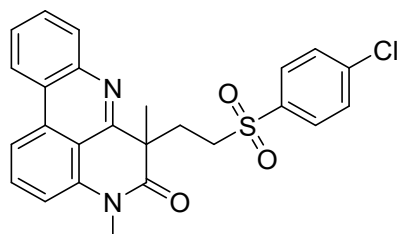

**6-(2-((4-chlorophenyl)sulfonyl)ethyl)-4,6-dimethyl-4H-pyrido[4,3,2-gh]phenanthridin-5(6H)-one (3y)** : 34.8 mg, 75% yield, brown yellow solid; mp 191–194 °C.  $^1\text{H}$  NMR (400 MHz, Chloroform-*d*)  $\delta$  8.52 (d,  $J = 8.3$  Hz, 1H), 8.28 (d,  $J = 8.3$  Hz, 1H), 7.90 (d,  $J = 8.2$  Hz, 1H), 7.84 (t,  $J = 8.1$  Hz, 1H), 7.79 – 7.71 (m, 3H), 7.67 (td,  $J = 7.6, 6.9, 1.4$  Hz, 1H), 7.45 (d,  $J = 8.5$  Hz, 2H), 7.22 (d,  $J = 7.9$  Hz, 1H), 3.56 (s, 3H), 3.23 – 3.10 (m, 1H), 3.04 – 2.92 (m, 1H), 2.87 (td,  $J = 12.6, 3.7$  Hz, 1H), 2.65 (td,  $J = 12.5, 4.7$  Hz, 1H), 1.63 (s, 3H).  $^{13}\text{C}$  NMR (101 MHz, Chloroform-*d*)  $\delta$  172.5, 157.3, 144.6, 140.3, 138.3, 137.2, 133.4, 132.1, 129.9, 129.6, 129.5, 129.4, 127.1, 122.7, 116.5, 111.8, 111.1, 52.5, 50.4, 31.7, 30.0, 29.7. HRMS (ESI-TOF)  $m/z$   $[\text{M} + \text{H}]^+$  calcd for  $\text{C}_{25}\text{H}_{22}\text{ClN}_2\text{O}_3\text{S}$  465.1034, found 465.1038.

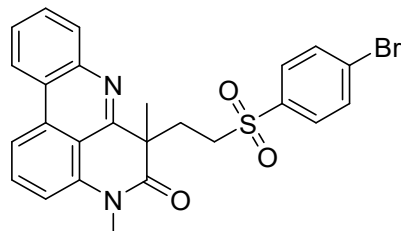

**6-(2-((4-bromophenyl)sulfonyl)ethyl)-4,6-dimethyl-4H-pyrido[4,3,2-gh]phenanthridin-5(6H)-one (3z)** : 36 mg, 71% yield, yellow solid; mp 175–177 °C.  $^1\text{H}$  NMR (400 MHz, Chloroform-*d*)  $\delta$  8.52 (d,  $J = 8.3$  Hz, 1H), 8.28 (d,  $J = 8.3$  Hz, 1H), 7.89 (d,  $J = 6.8$  Hz, 1H), 7.84 (t,  $J = 8.1$  Hz, 1H), 7.78 (t,  $J = 7.6$  Hz, 1H), 7.66 (p,  $J = 8.4$  Hz, 5H), 7.22 (d,  $J = 7.9$  Hz, 1H), 3.56 (s, 3H), 3.23 – 3.10 (m, 1H), 3.04 – 2.92 (m, 1H), 2.86 (td,  $J = 12.6, 3.7$  Hz, 1H), 2.72 – 2.59 (m, 1H), 1.63 (s, 3H).  $^{13}\text{C}$  NMR (101 MHz, Chloroform-*d*)  $\delta$  172.5, 157.3, 144.6, 138.4, 137.7, 133.4, 132.5, 132.1, 129.9, 129.7, 129.4, 128.9, 127.1, 122.7, 122.6, 116.5, 111.8, 111.1, 52.4, 50.4, 31.7, 30.0, 29.7. HRMS (ESI-TOF)  $m/z$   $[\text{M} + \text{H}]^+$  calcd for  $\text{C}_{25}\text{H}_{22}\text{BrN}_2\text{O}_3\text{S}$  509.0529, found 509.0529.

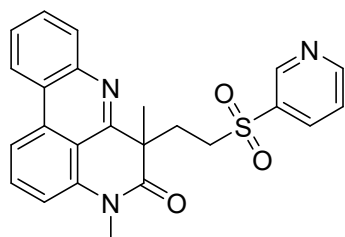

**4,6-dimethyl-6-(2-(pyridin-3-ylsulfonyl)ethyl)-4H-pyrido[4,3,2-gh]phenanthridin-5(6H)-one (3aa)** : 29 mg, 69% yield, white solid; mp 161–165 °C. <sup>1</sup>H NMR (400 MHz, Chloroform-*d*) δ 9.08 (s, 1H), 8.90 (d, *J* = 6.6 Hz, 1H), 8.52 (d, *J* = 8.2 Hz, 1H), 8.29 (d, *J* = 8.3 Hz, 1H), 8.14 (d, *J* = 8.1 Hz, 1H), 7.94 (d, *J* = 8.1 Hz, 1H), 7.85 (t, *J* = 8.1 Hz, 1H), 7.76 (t, *J* = 6.9 Hz, 1H), 7.67 (t, *J* = 7.6 Hz, 1H), 7.49 (dd, *J* = 8.0, 4.8 Hz, 1H), 7.23 (d, *J* = 7.9 Hz, 1H), 3.56 (s, 3H), 3.28 – 3.16 (m, 1H), 3.16 – 3.04 (m, 1H), 2.93 (td, *J* = 12.5, 3.9 Hz, 1H), 2.71 (td, *J* = 12.4, 4.7 Hz, 1H), 1.61 (s, 3H). <sup>13</sup>C NMR (101 MHz, Chloroform-*d*) δ 172.4, 157.3, 154.1, 149.2, 144.7, 138.3, 136.0, 135.3, 133.5, 132.2, 129.9, 129.4, 127.2, 123.8, 122.8, 122.6, 116.5, 111.8, 111.1, 52.9, 50.5, 31.1, 30.2, 30.0. HRMS (ESI-TOF) *m/z* [M + H]<sup>+</sup> calcd for C<sub>24</sub>H<sub>22</sub>N<sub>3</sub>O<sub>3</sub>S 432.1376, found 432.1378.

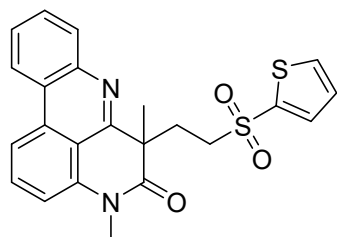

**4,6-dimethyl-6-(2-(thiophen-2-ylsulfonyl)ethyl)-4H-pyrido[4,3,2-gh]phenanthridin-5(6H)-one (3ab)** : 26.5 mg, 62% yield, white solid; mp 177–179 °C. <sup>1</sup>H NMR (400 MHz, Chloroform-*d*) δ 8.53 (d, *J* = 8.2 Hz, 1H), 8.29 (d, *J* = 8.3 Hz, 1H), 8.02 (d, *J* = 8.1 Hz, 1H), 7.85 (t, *J* = 8.1 Hz, 1H), 7.80 – 7.72 (m, 1H), 7.71 – 7.63 (m, 3H), 7.23 (d, *J* = 7.9 Hz, 1H), 7.19 – 7.13 (m, 1H), 3.56 (s, 3H), 3.31 – 3.17 (m, 1H), 3.16 – 3.05 (m, 1H), 2.98 (td, *J* = 12.5, 3.8 Hz, 1H), 2.74 (td, *J* = 12.4, 4.7 Hz, 1H), 1.67 (s, 3H). <sup>13</sup>C NMR (101 MHz, Chloroform-*d*) δ 172.5, 157.5, 139.8, 138.5, 134.3, 133.9, 133.5, 132.2, 129.8, 129.4, 127.8, 127.2, 122.8, 122.6, 116.5, 111.8, 111.1, 54.0, 50.3, 32.3, 30.0, 29.6. HRMS (ESI-TOF) *m/z* [M + H]<sup>+</sup> calcd for C<sub>23</sub>H<sub>21</sub>N<sub>2</sub>O<sub>3</sub>S<sub>2</sub> 437.0988, found 437.0988.

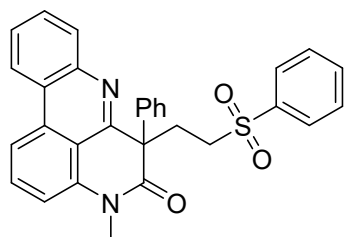

**4-methyl-6-phenyl-6-(2-(thiophen-2-ylsulfonyl)ethyl)-4H-pyrido[4,3,2-gh]phenanthridin-5(6H)-one (3ac)** : 16 mg, 33% yield, yellow oil. <sup>1</sup>H NMR (400 MHz, Chloroform-*d*) δ 8.54 (d, *J* = 8.1 Hz, 1H), 8.27 (d, *J* = 8.3 Hz, 1H), 7.98 (d, *J* = 8.1 Hz, 1H), 7.93 (d, *J* = 7.4 Hz, 2H), 7.79 (q, *J* = 8.1 Hz, 2H), 7.69 (q, *J* = 6.9 Hz, 2H),

7.58 (t,  $J = 7.7$  Hz, 2H), 7.15 (d,  $J = 7.9$  Hz, 1H), 7.12 – 7.06 (m, 3H), 7.00 – 6.89 (m, 2H), 3.56 (s, 3H), 3.41 – 3.28 (m, 3H), 3.18 – 3.09 (m, 1H).  $^{13}\text{C}$  NMR (101 MHz, Chloroform- $d$ )  $\delta$  170.4, 155.4, 142.0, 139.1, 138.3, 133.5, 133.3, 132.1, 130.4, 129.4, 129.2, 128.7, 128.3, 127.6, 127.4, 126.4, 122.9, 122.6, 116.5, 113.0, 111.2, 58.8, 53.2, 30.6, 30.4. HRMS (ESI-TOF)  $m/z$   $[\text{M} + \text{H}]^+$  calcd for  $\text{C}_{30}\text{H}_{25}\text{N}_2\text{O}_3\text{S}$  493.1580, found 493.1583.

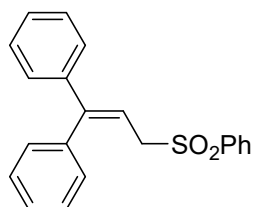

**(3-(phenylsulfonyl)prop-1-ene-1,1-diyl)dibenzene (5)** : 25.8 mg, 77% yield, colorless oil.  $^1\text{H}$  NMR (400 MHz, Chloroform- $d$ )  $\delta$  7.82 – 7.74 (m, 2H), 7.63 (t,  $J = 7.5$  Hz, 1H), 7.50 (t,  $J = 7.8$  Hz, 2H), 7.27 (t,  $J = 3.6$  Hz, 3H), 7.25 – 7.19 (m, 3H), 7.16 (d,  $J = 2.5$  Hz, 1H), 7.15 – 7.13 (m, 1H), 6.71 – 6.61 (m, 2H), 6.13 (t,  $J = 7.9$  Hz, 1H), 3.92 (d,  $J = 7.9$  Hz, 2H).  $^{13}\text{C}$  NMR (101 MHz, Chloroform- $d$ )  $\delta$  149.8, 140.8, 138.6, 137.8, 133.7, 129.2, 129.1, 128.5, 128.4, 128.3, 128.3, 127.8, 127.4, 114.0, 57.5. HRMS (ESI-TOF)  $m/z$   $[\text{M} + \text{H}]^+$  calcd for  $\text{C}_{21}\text{H}_{19}\text{O}_2\text{S}$  335.1100, found 335.1103.

## 8. References

- [1] Chen, M.; Chen, J.-Q.; Chen, Z.; Wu, J., Synthesis of ester-containing phenanthridines via photoredox-catalyzed radical cascade cyclization of N-arylacrylamides with alkyloxalyl chlorides. *Org. Chem. Front* **2023**, *10*, 3995.
- [2] Li, X.; Fang, X.; Zhuang, S.; Liu, P.; Sun, P., Photoredox Catalysis: Construction of Polyheterocycles via Alkoxyacylation/Addition/Cyclization Sequence. *Org. Lett.* **2017**, *19*, 3580.
- [3] Shang, J.-Q.; Wang, S.-S.; Fu, H.; Li, Y.; Yang, T.; Li, Y.-M., Oxidative radical cascade cyclization involving C(sp<sup>3</sup>)–C(sp<sup>3</sup>), C(sp<sup>3</sup>)–C(sp<sup>2</sup>) and C(sp<sup>2</sup>)–N bonds formation: direct construction of cyano and methyl substituted polyheterocycles. *Org. Chem. Front.* **2018**, *5*, 1945.
- [4] Liu, F.; Li, P.-X., Visible-Light-Promoted (Phenylsulfonyl)methylation of Electron-Rich Heteroarenes and N-Arylacrylamides. *J. Org. Chem.* **2016**, *81*, 6972.
- [5] Mi, X.; Kong, Y.-F.; Zhang, J.-Y.; Pi, C.; Cui, X.-L., Visible-light-promoted sulfonylmethylation of imidazopyridines. *Chin. Chem. Lett.* **2019**, *30*, 2295.
- [6] Frederick, G.-B.; Anthony, H.-C.; Donald, E.-Smith.; John, B., Reactions of Carbanions with Electron Acceptors. *J. Org. Chem.* **1985**, *50*, 1151.

## 9. Copies of $^1\text{H}$ , $^{13}\text{C}$ and $^{19}\text{F}$ NMR spectra

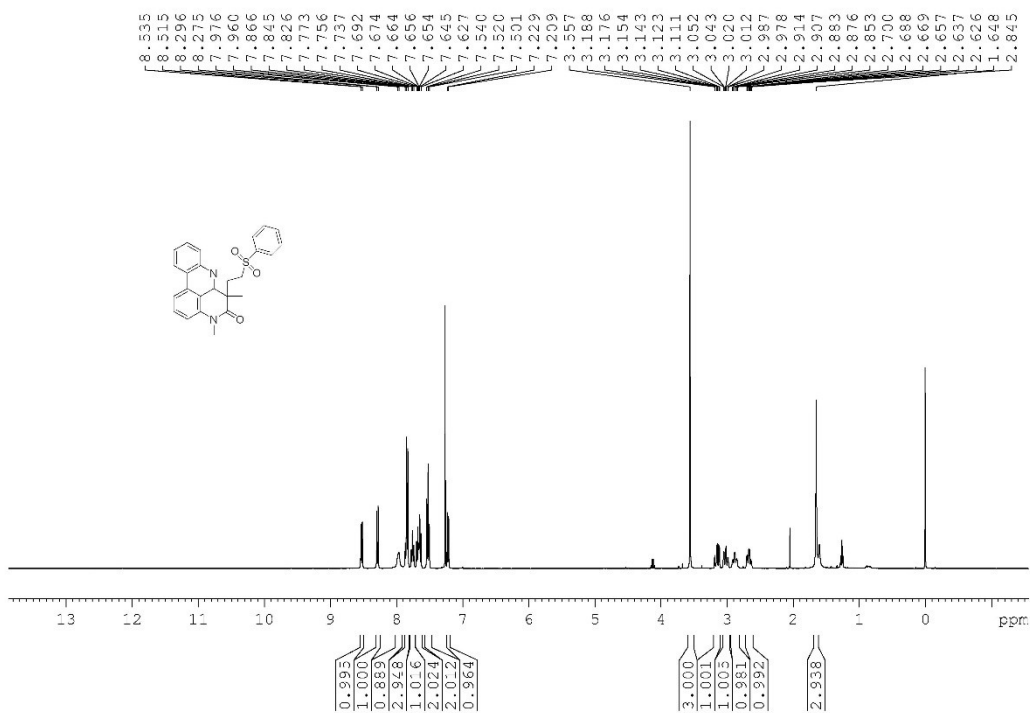

$^1\text{H}$  NMR spectrum of compound 3a

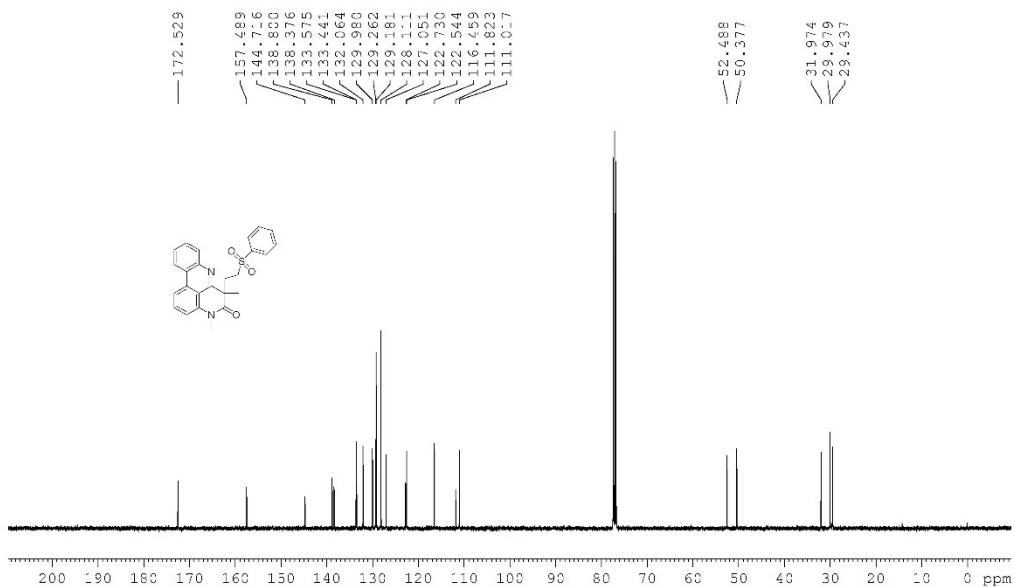

$^{13}\text{C}$  NMR spectrum of compound 3a

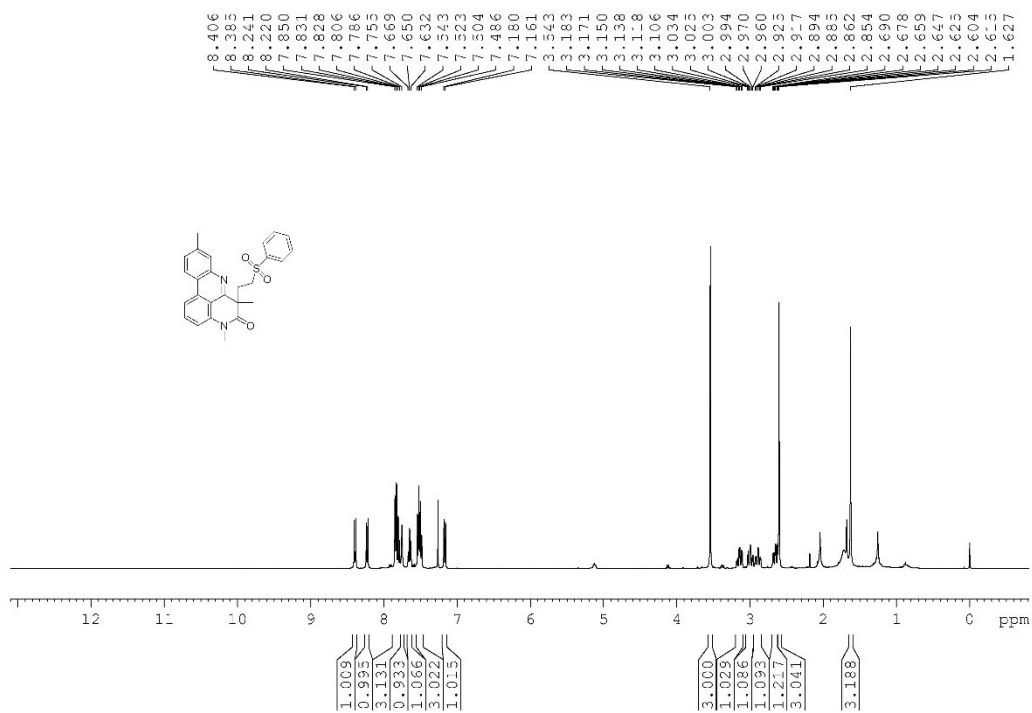

**<sup>1</sup>H NMR spectrum of compound 3b**

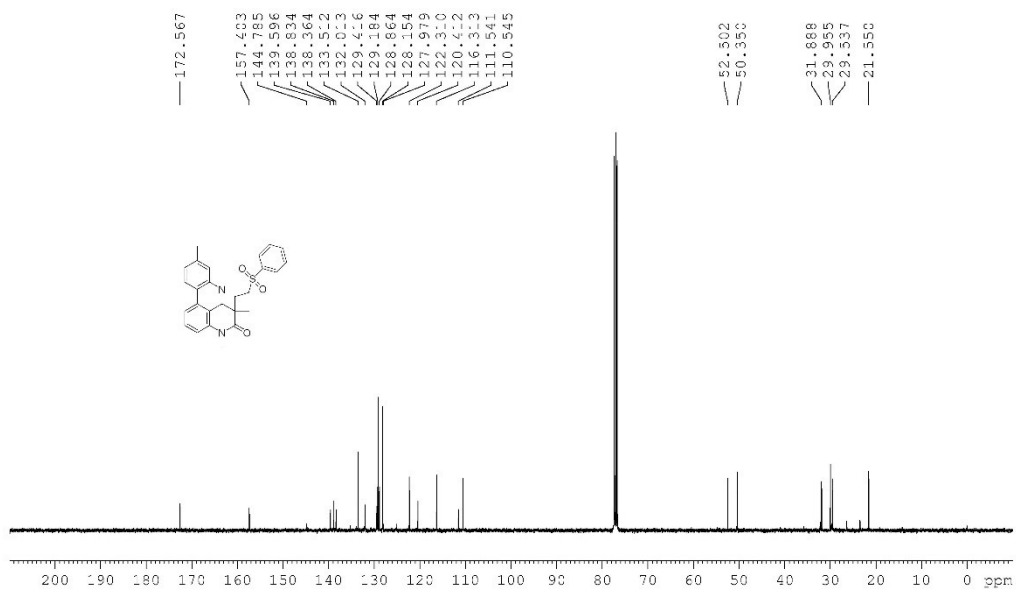

**<sup>13</sup>C NMR spectrum of compound 3b**





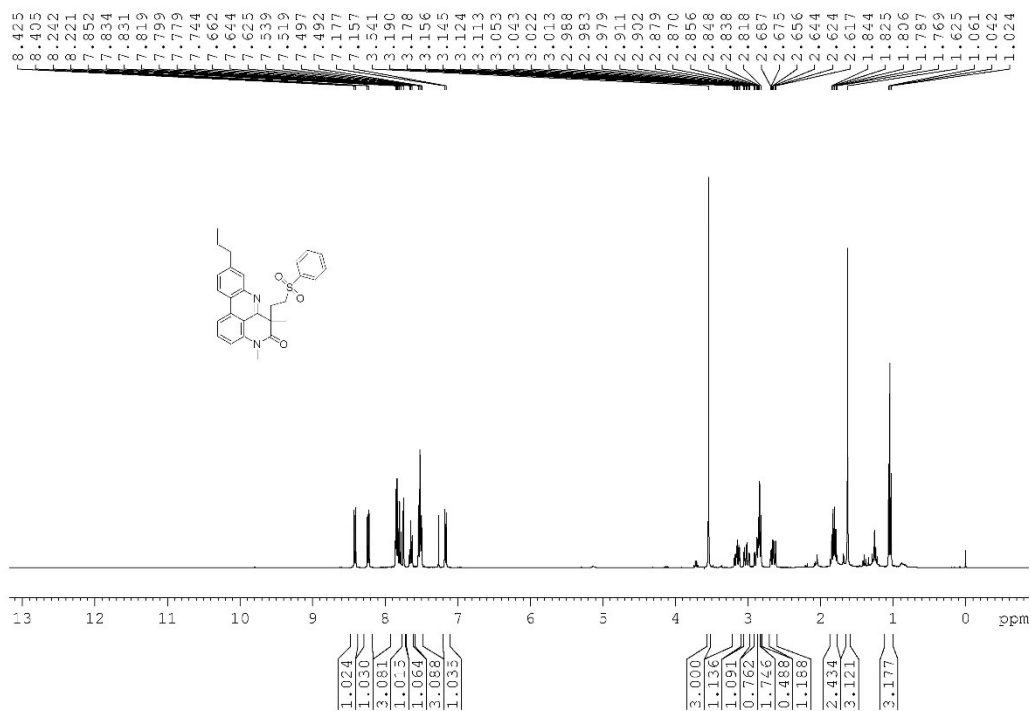

**<sup>1</sup>H NMR spectrum of compound 3d**

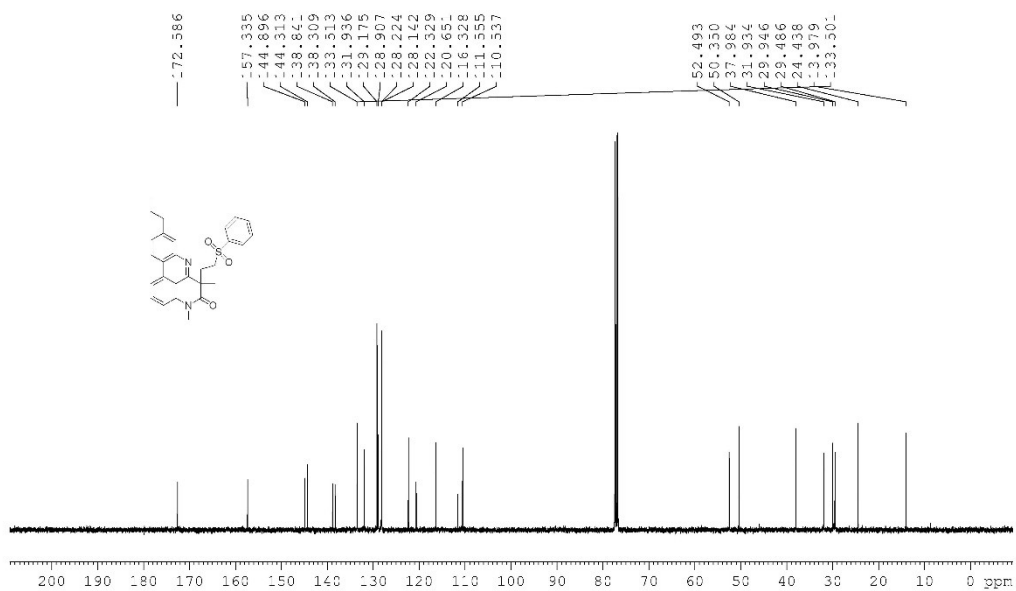

**<sup>13</sup>C NMR spectrum of compound 3d**

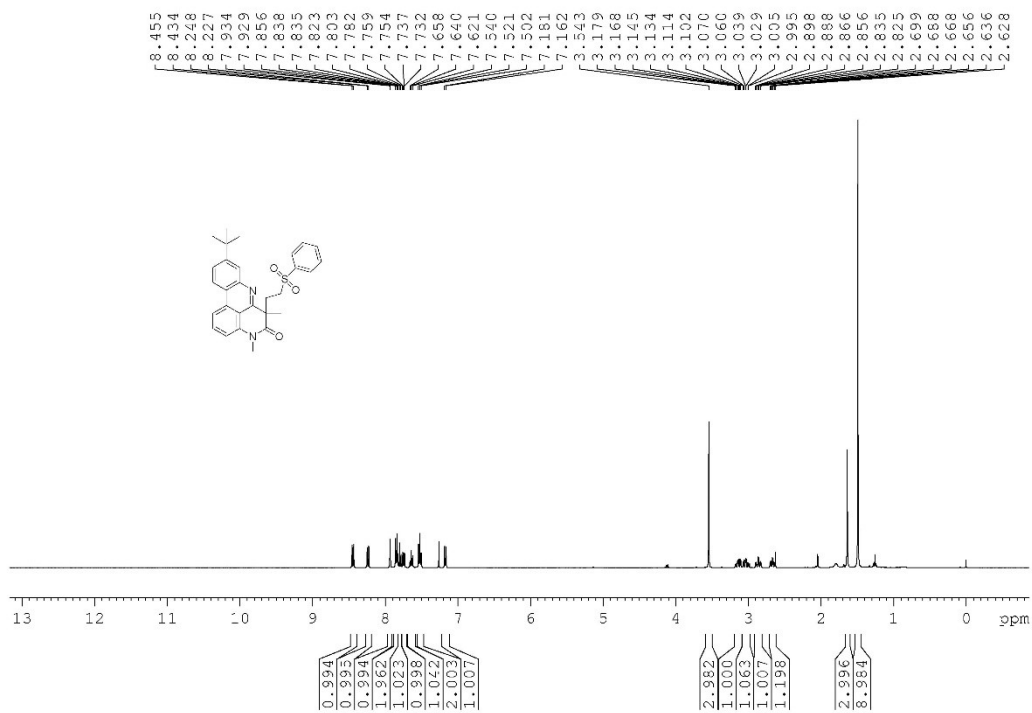

<sup>1</sup>H NMR spectrum of compound 3e

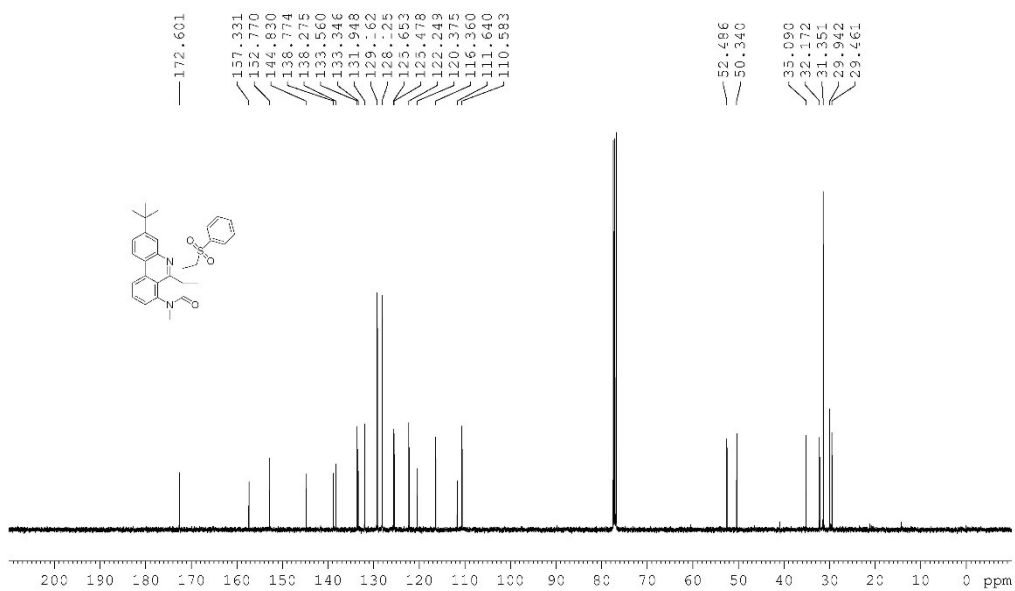

<sup>13</sup>C NMR spectrum of compound 3e

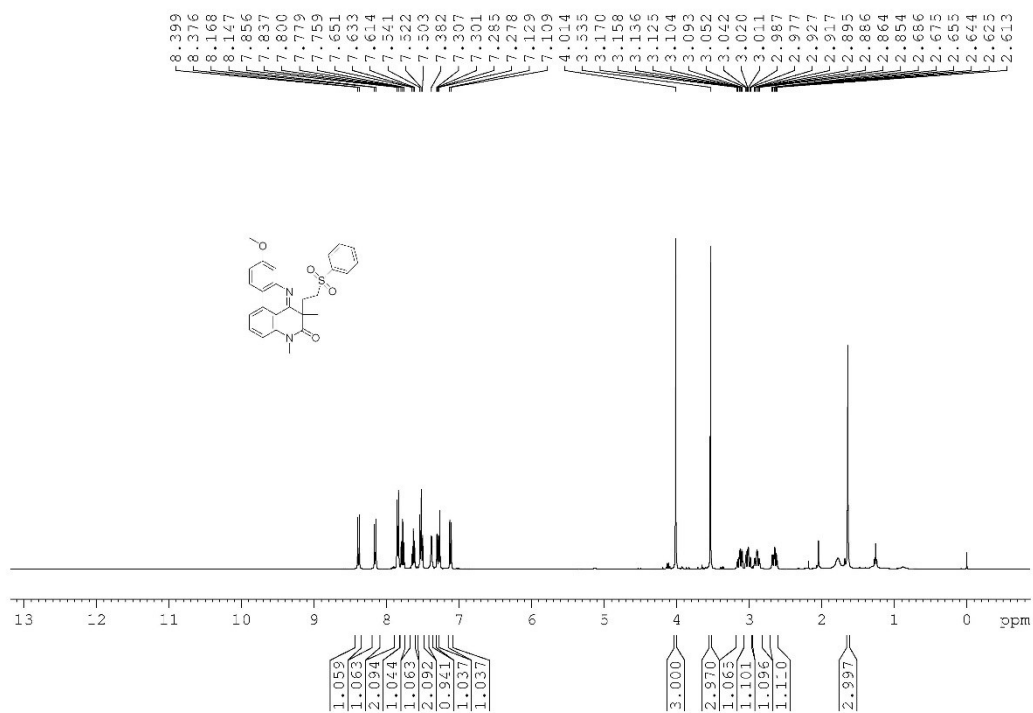

<sup>1</sup>H NMR spectrum of compound **3f**

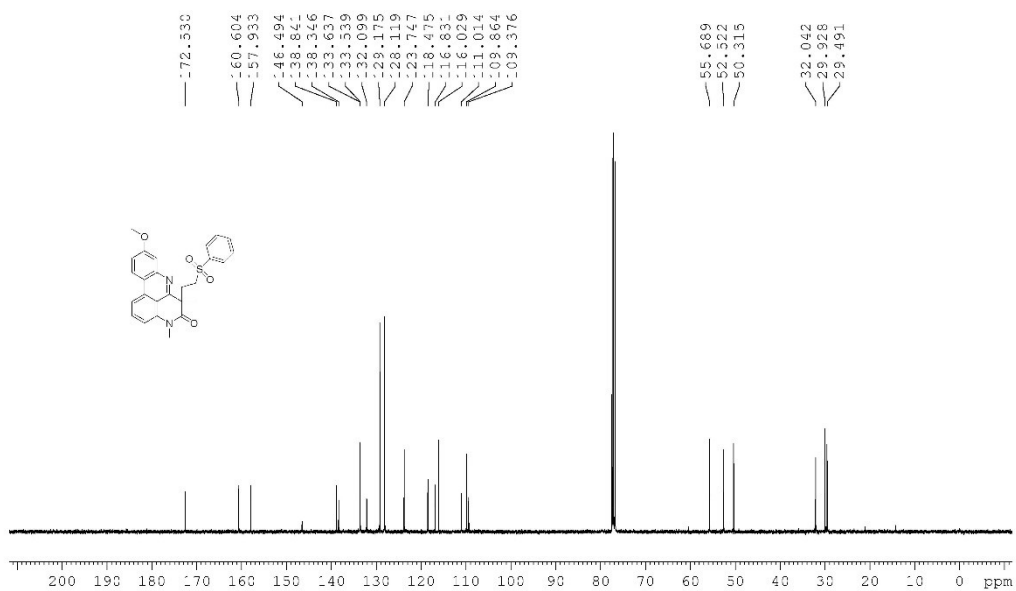

<sup>13</sup>C NMR spectrum of compound **3f**

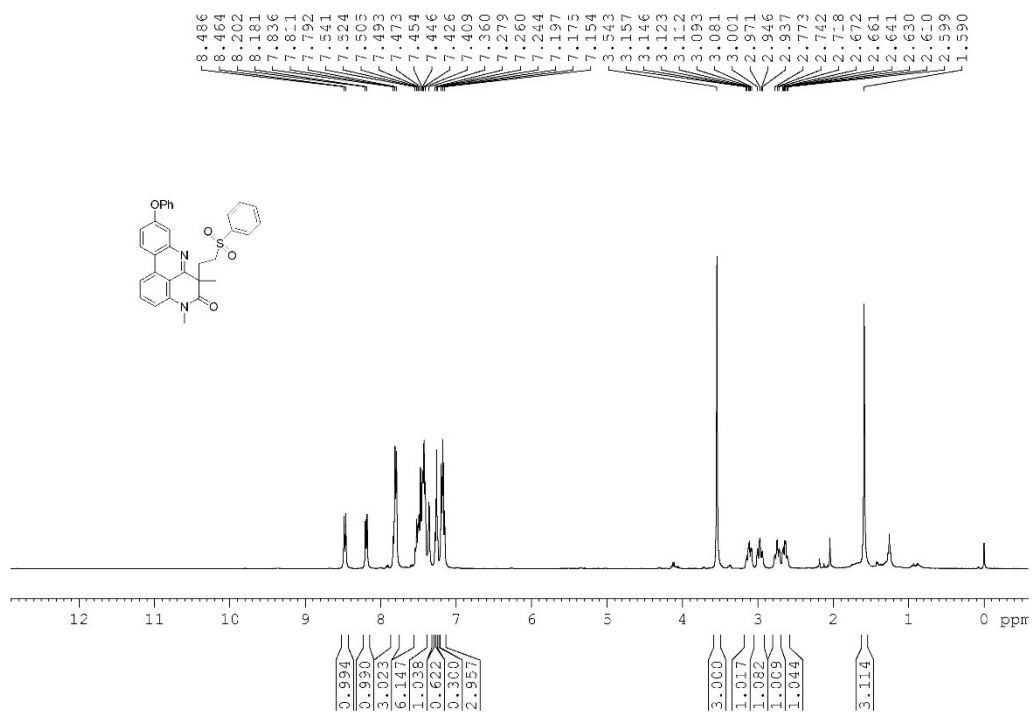

<sup>1</sup>H NMR spectrum of compound **3g**

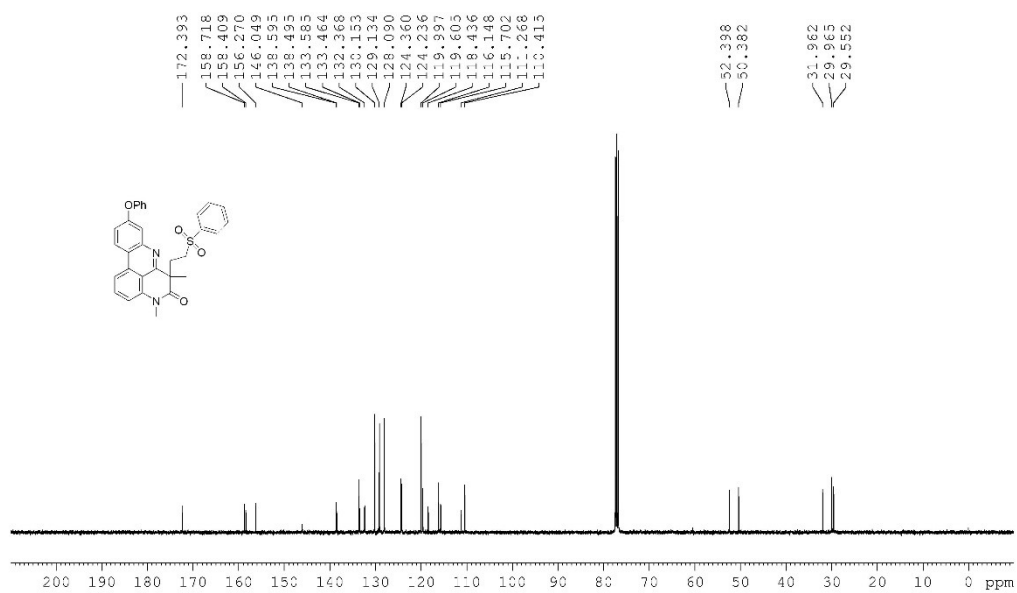

<sup>13</sup>C NMR spectrum of compound **3g**

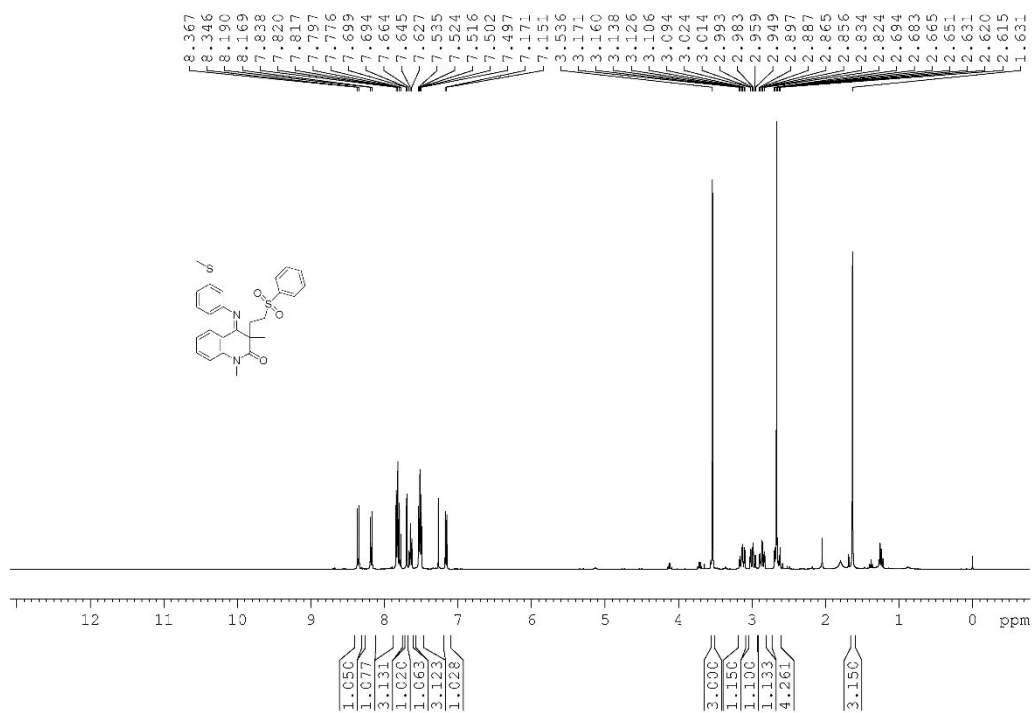

**<sup>1</sup>H NMR spectrum of compound 3h**

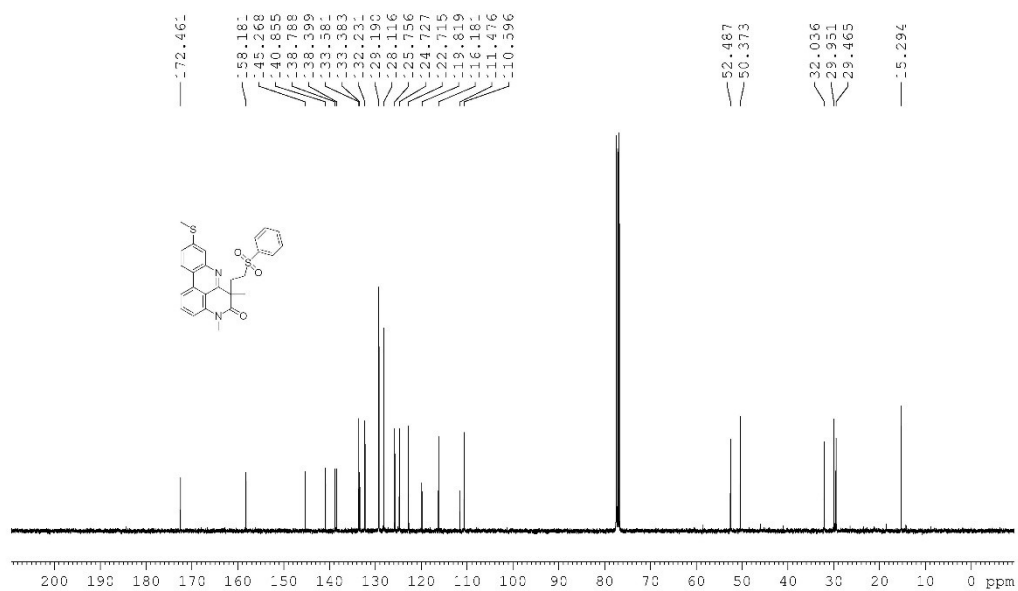

**<sup>13</sup>C NMR spectrum of compound 3h**

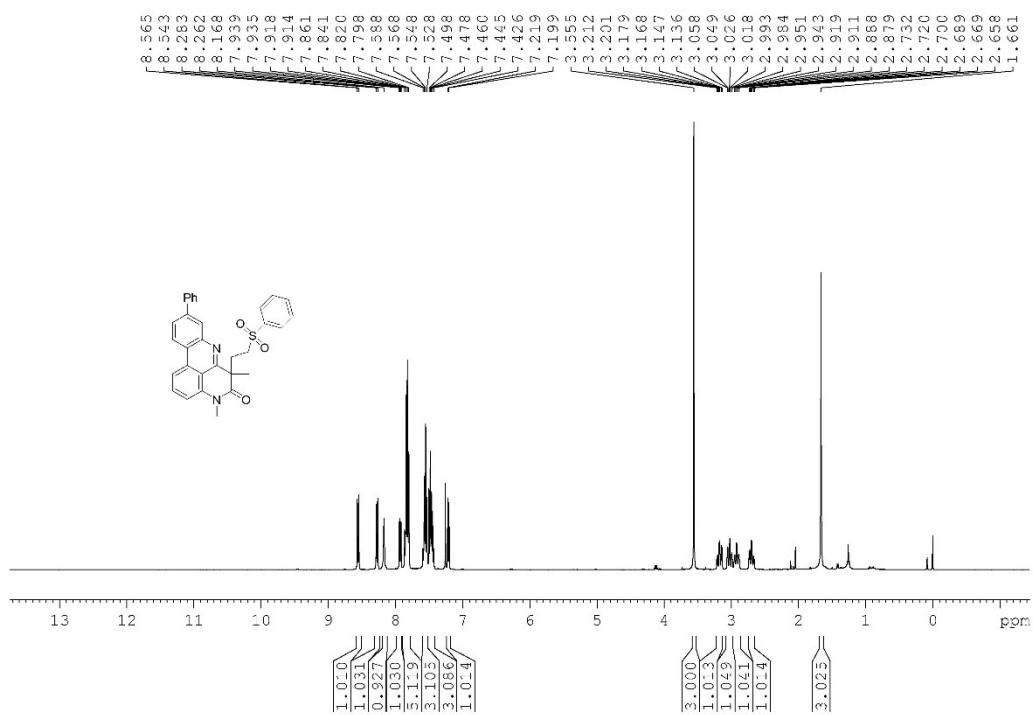

<sup>1</sup>H NMR spectrum of compound **3i**

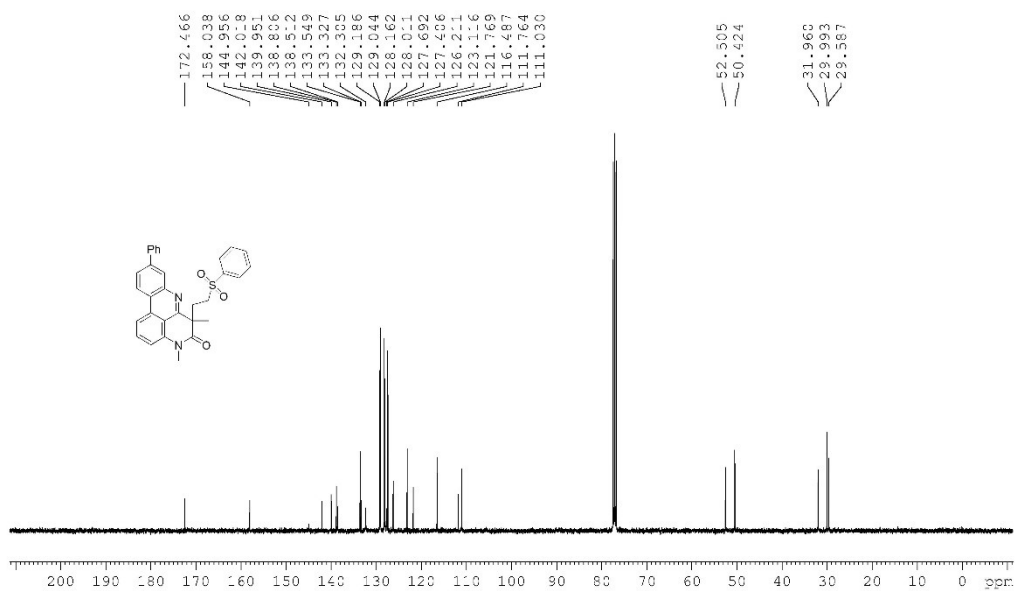

<sup>13</sup>C NMR spectrum of compound **3i**

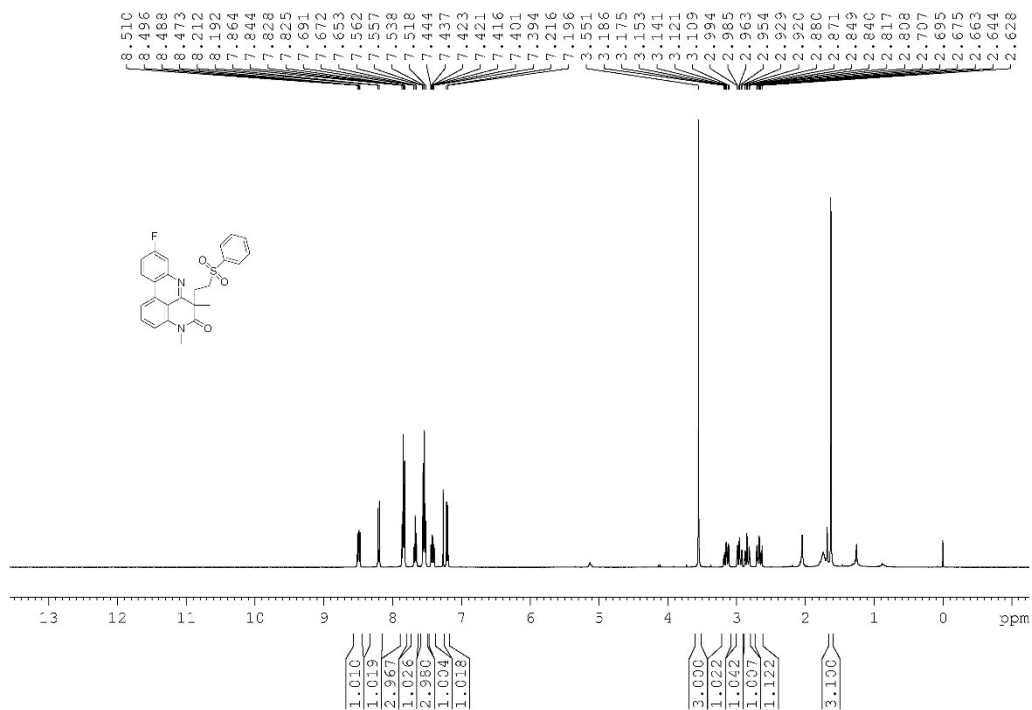

**<sup>1</sup>H NMR spectrum of compound 3j**

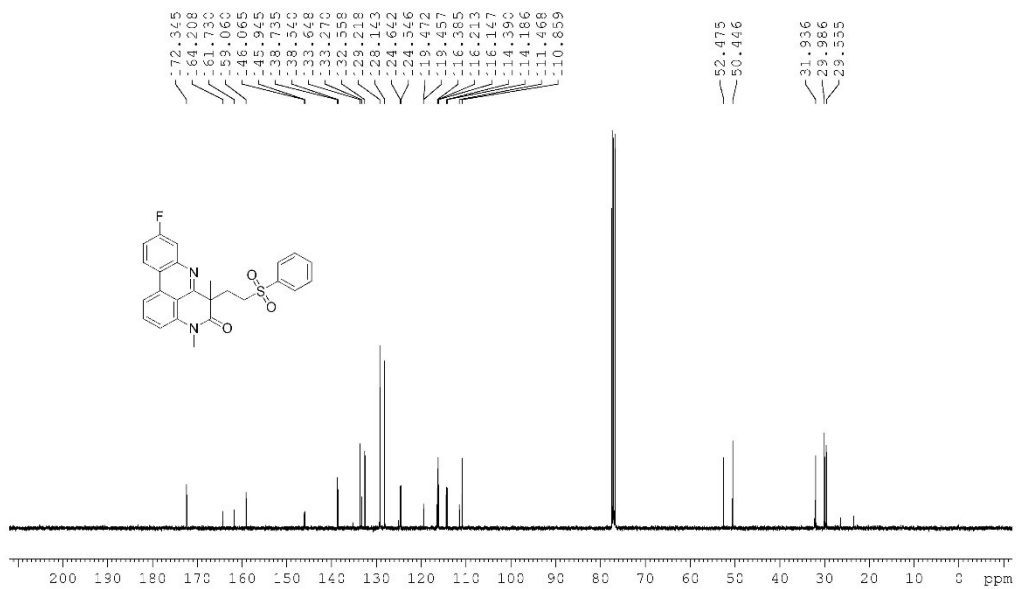

**<sup>13</sup>C NMR spectrum of compound 3j**

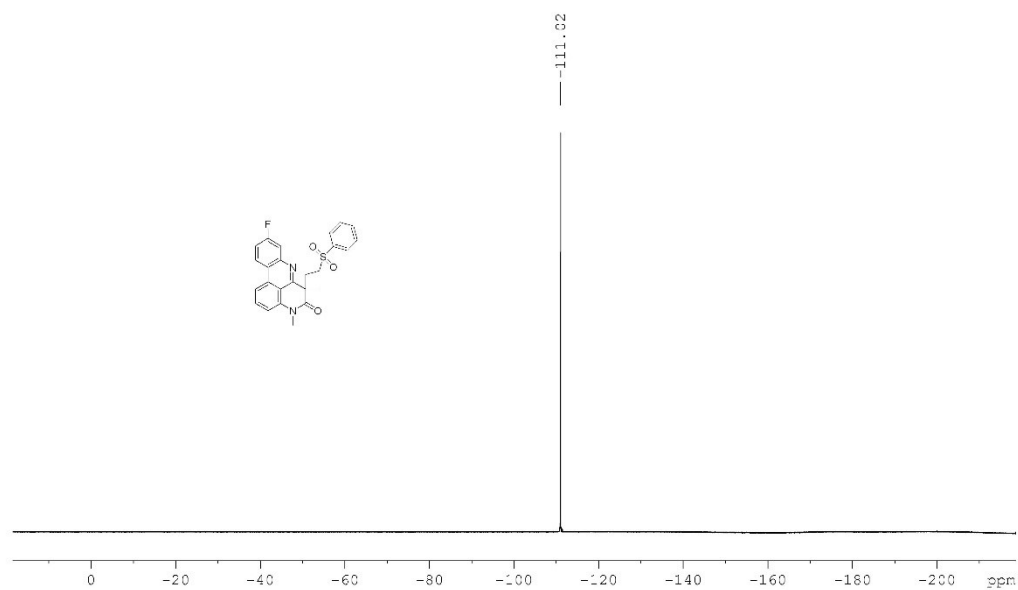

**<sup>19</sup>F NMR spectrum of compound 3j**

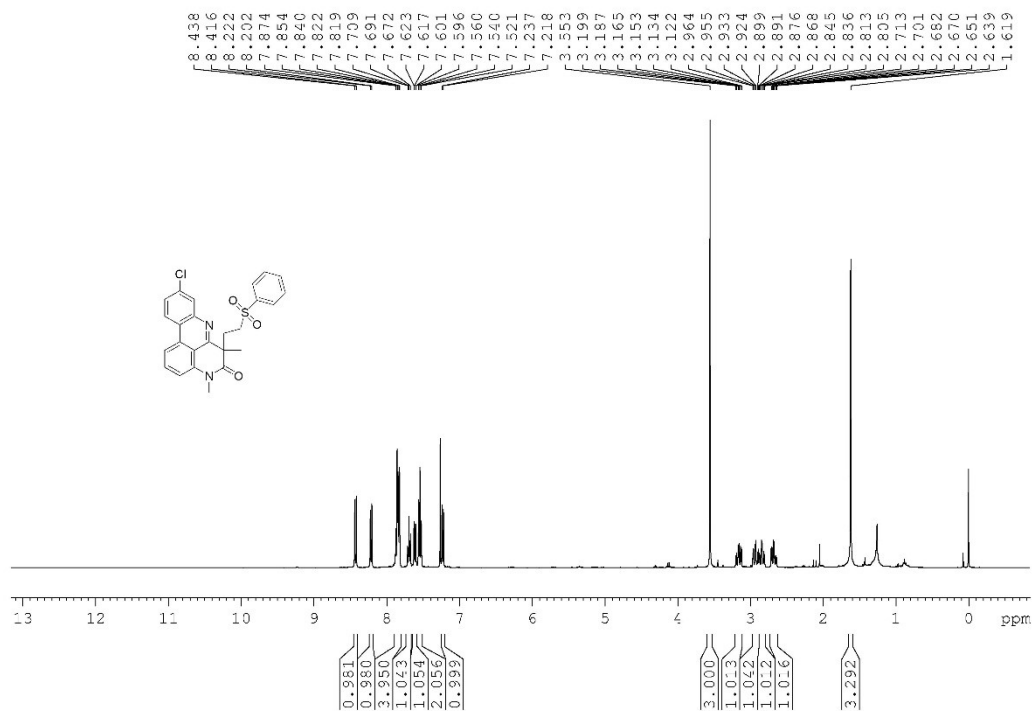

**<sup>1</sup>H NMR spectrum of compound 3k**



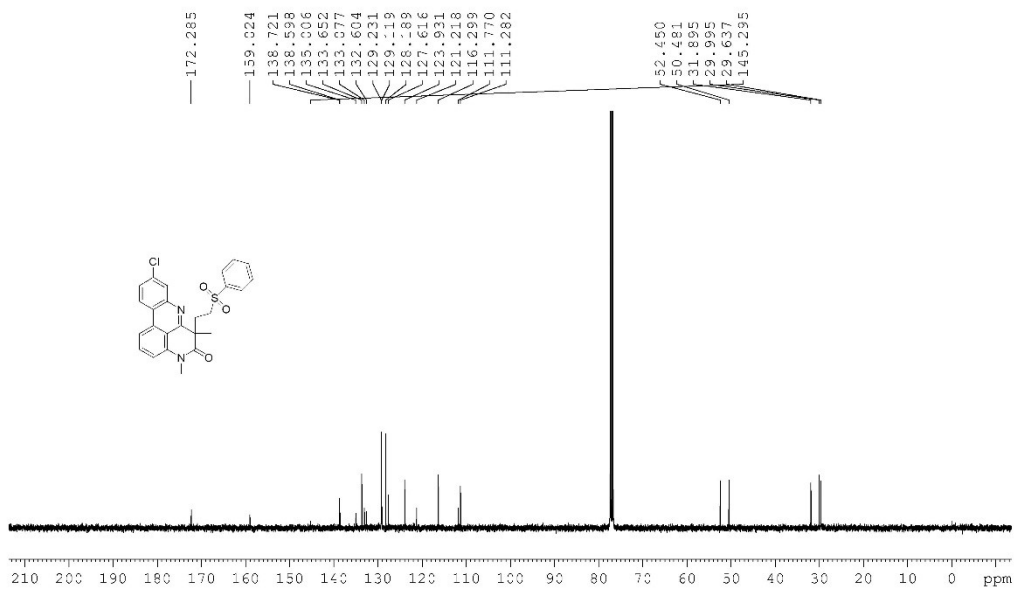

**<sup>13</sup>C NMR spectrum of compound 3k**

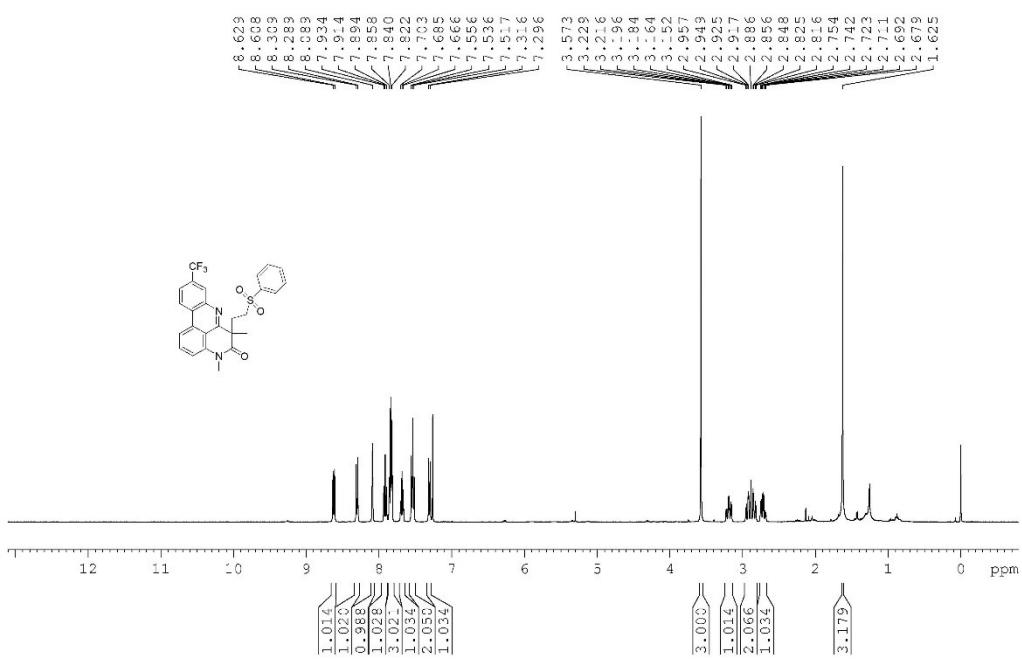

**<sup>1</sup>H NMR spectrum of compound 3l**

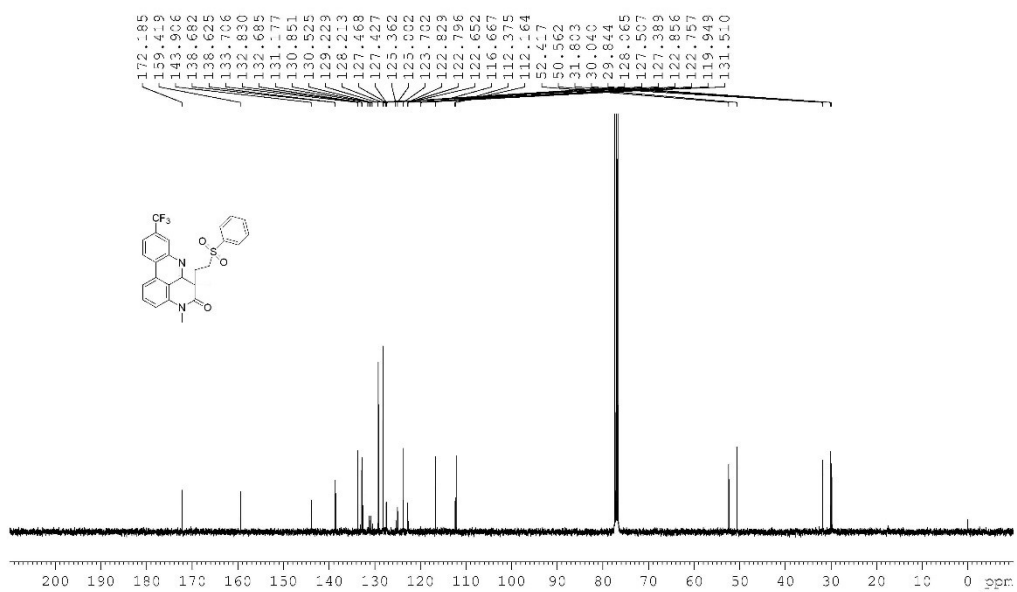

<sup>13</sup>C NMR spectrum of compound 31

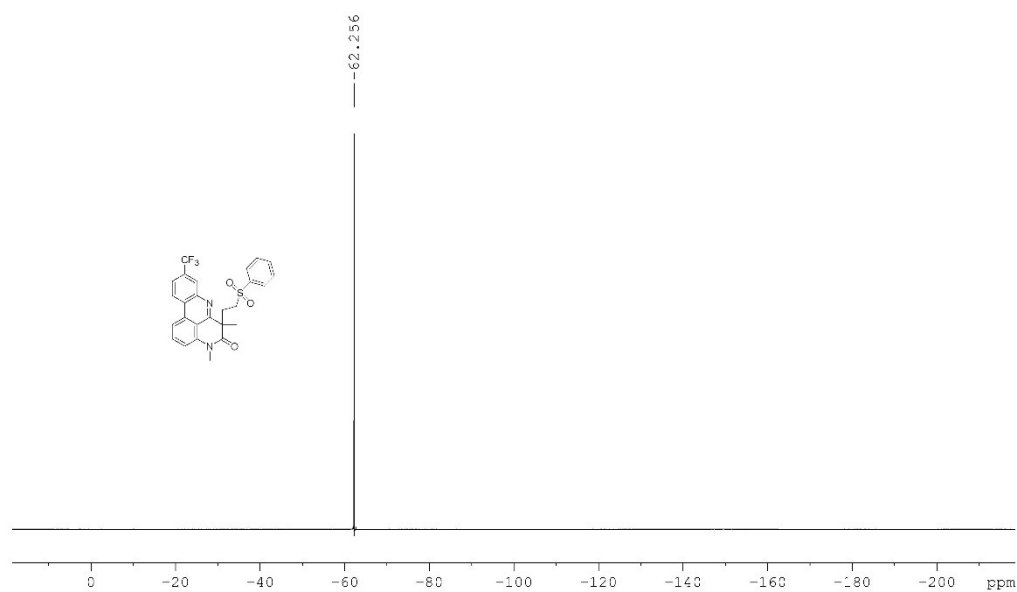

<sup>19</sup>F NMR spectrum of compound 31

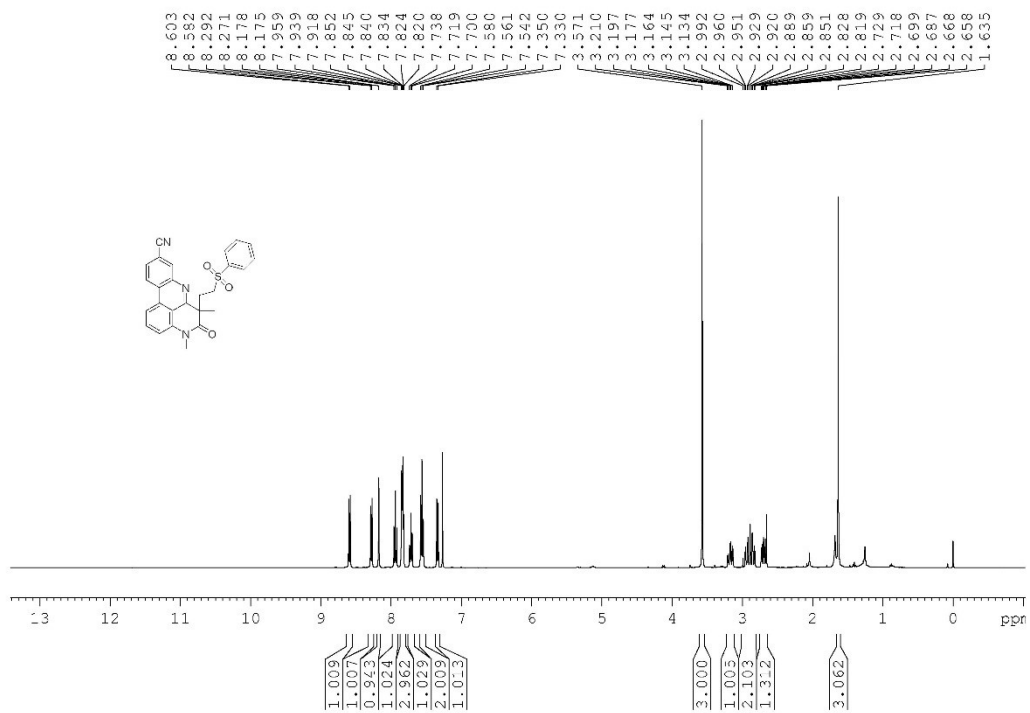

**<sup>1</sup>H NMR spectrum of compound 3m**

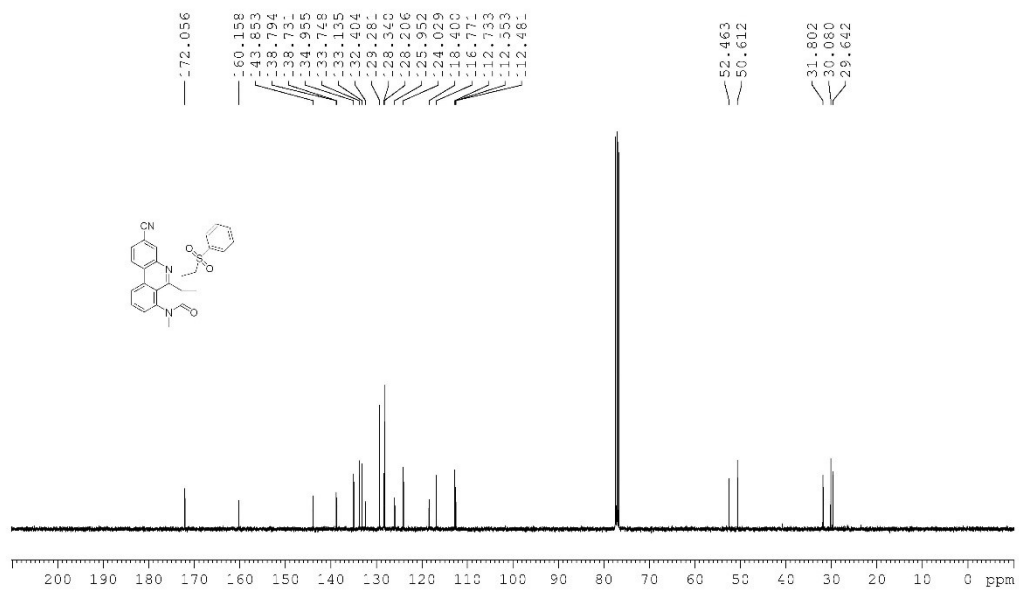

**<sup>13</sup>C NMR spectrum of compound 3m**

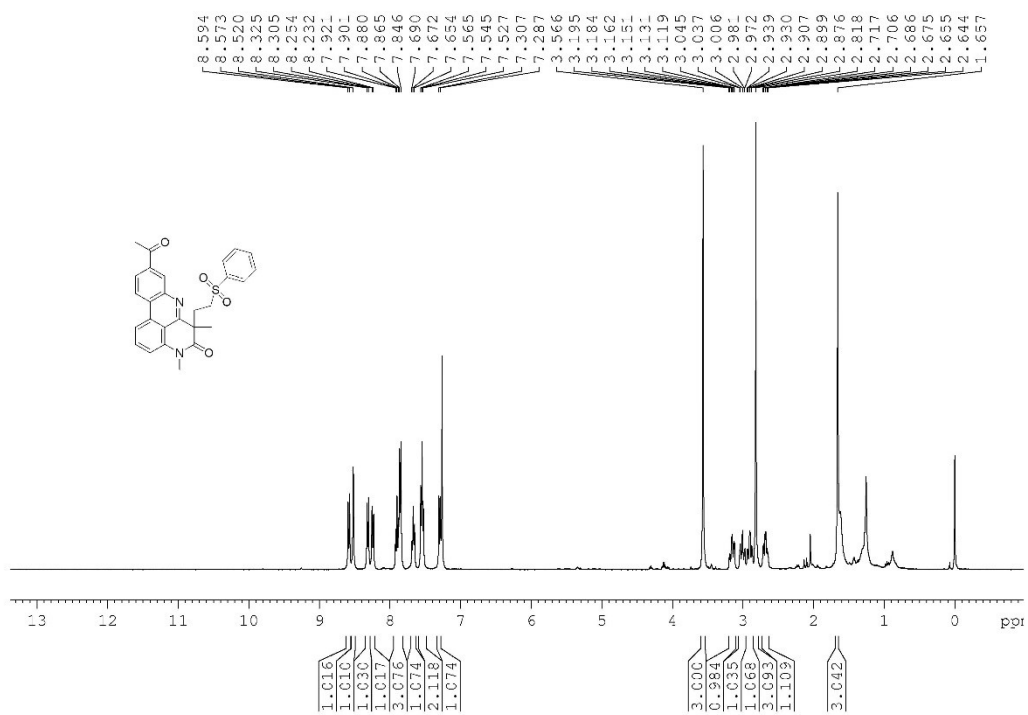

<sup>1</sup>H NMR spectrum of compound **3n**

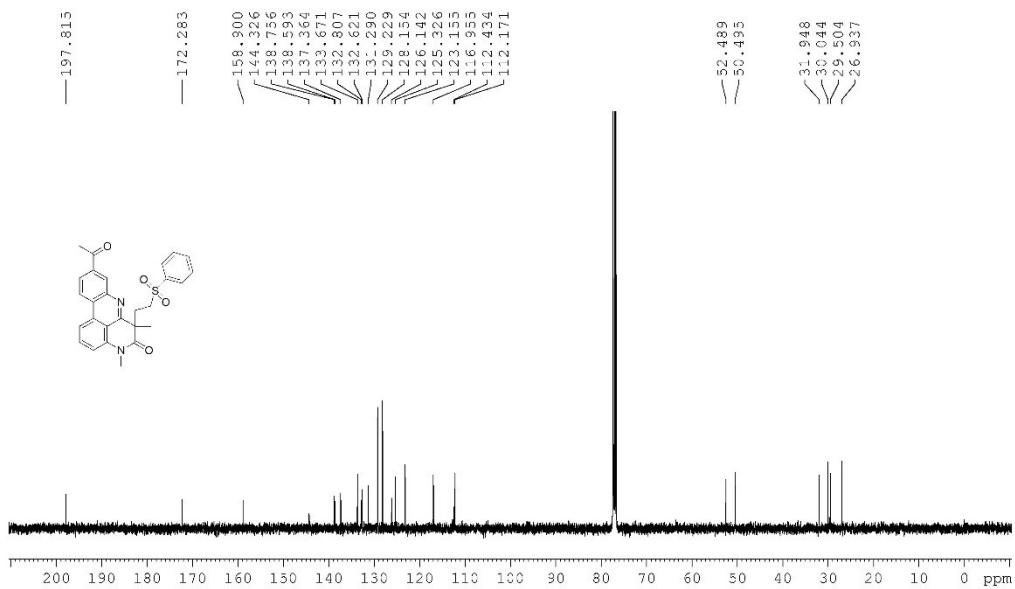

<sup>13</sup>C NMR spectrum of compound **3n**

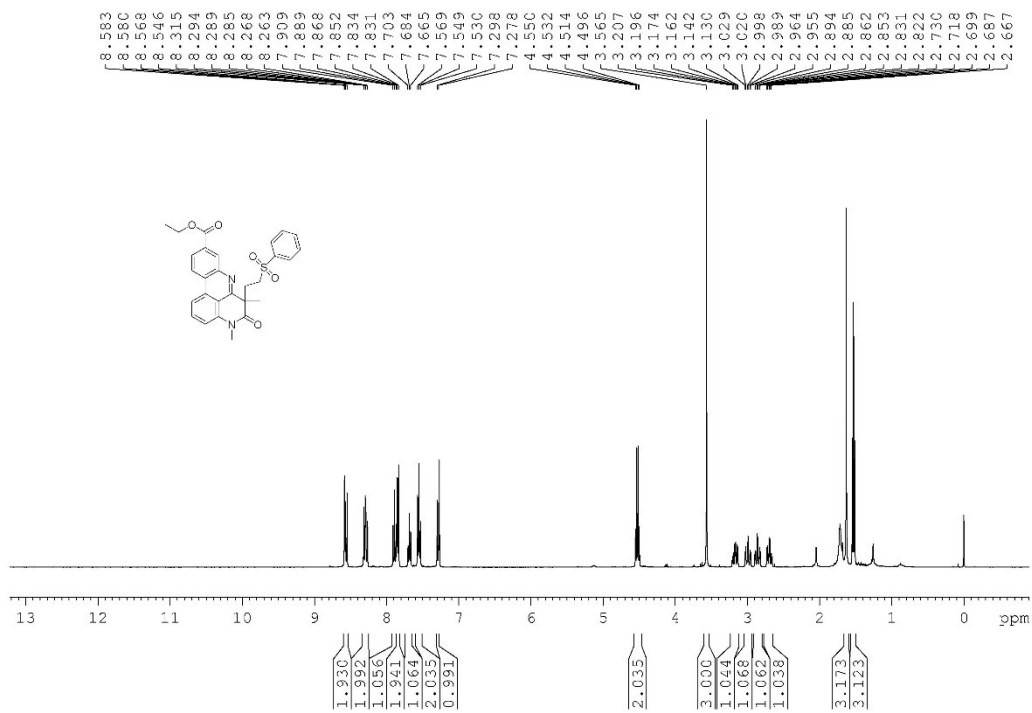

<sup>1</sup>H NMR spectrum of compound **30**

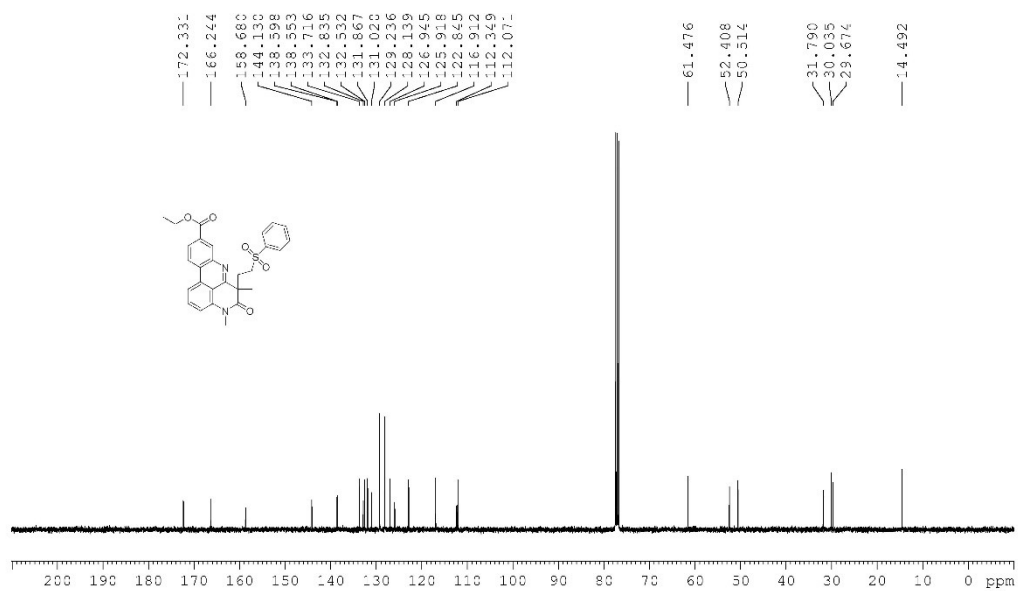

<sup>13</sup>C NMR spectrum of compound **30**

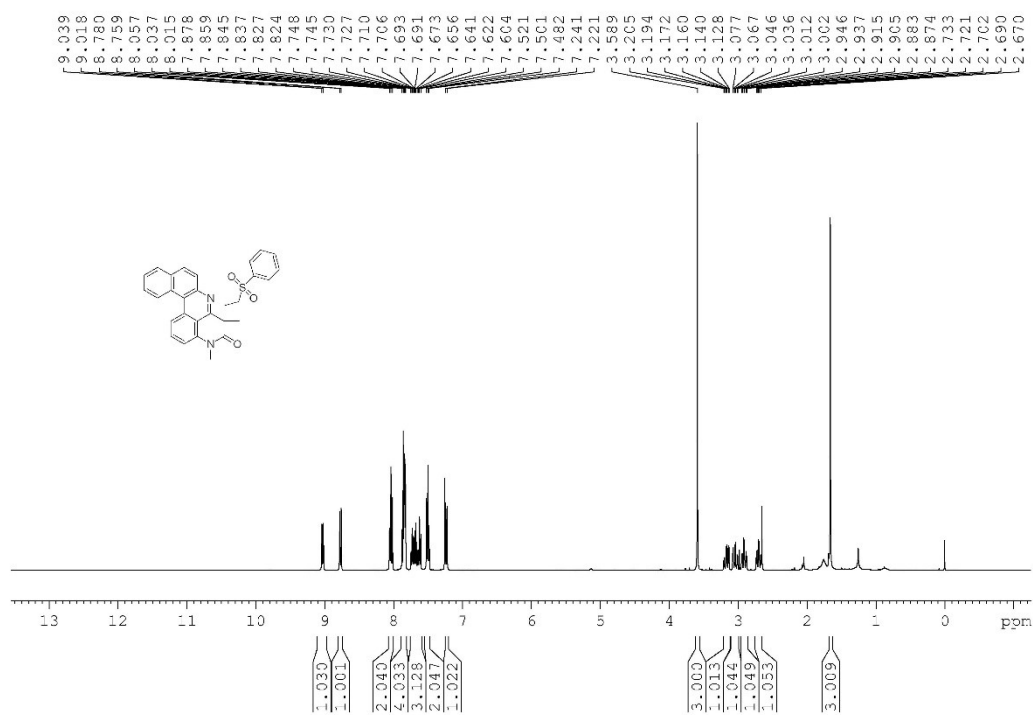

**<sup>1</sup>H NMR spectrum of compound 3p**

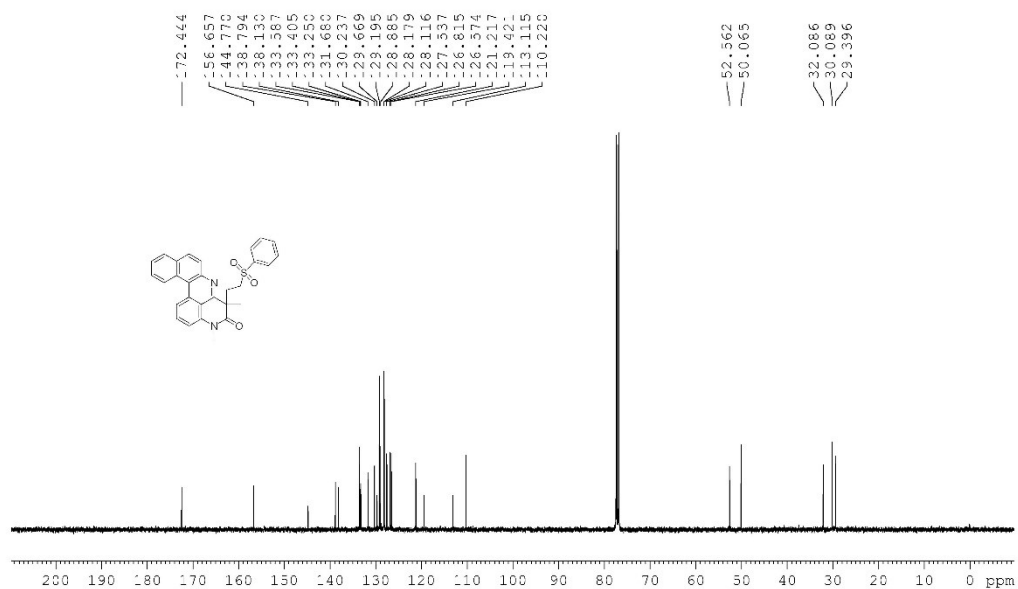

**<sup>13</sup>C NMR spectrum of compound 3p**



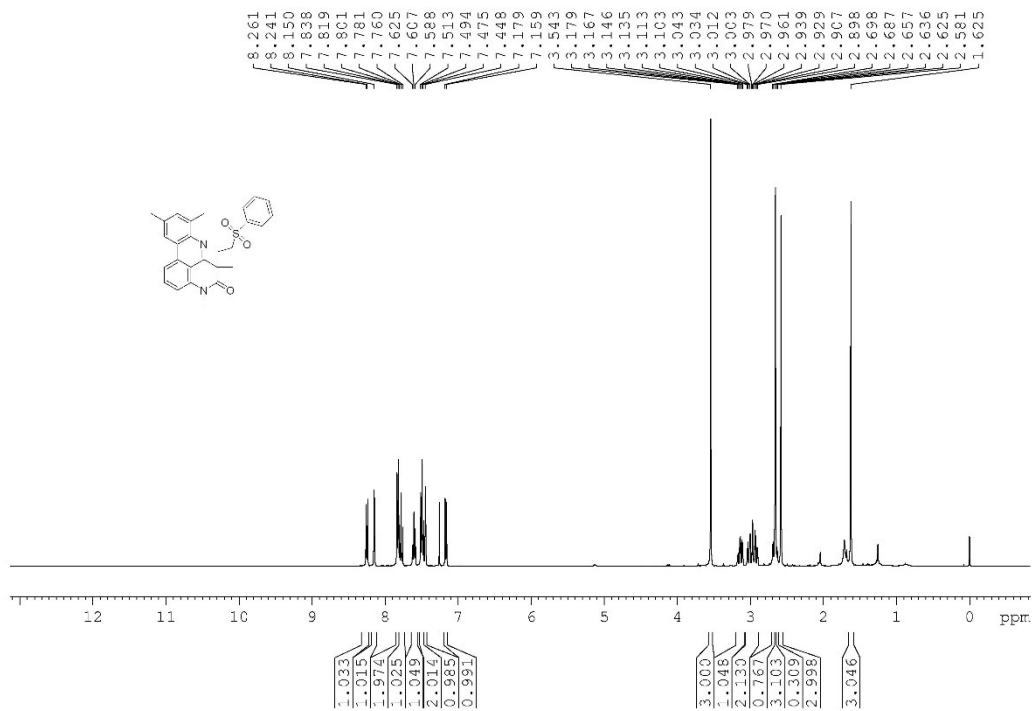

<sup>1</sup>H NMR spectrum of compound 3r

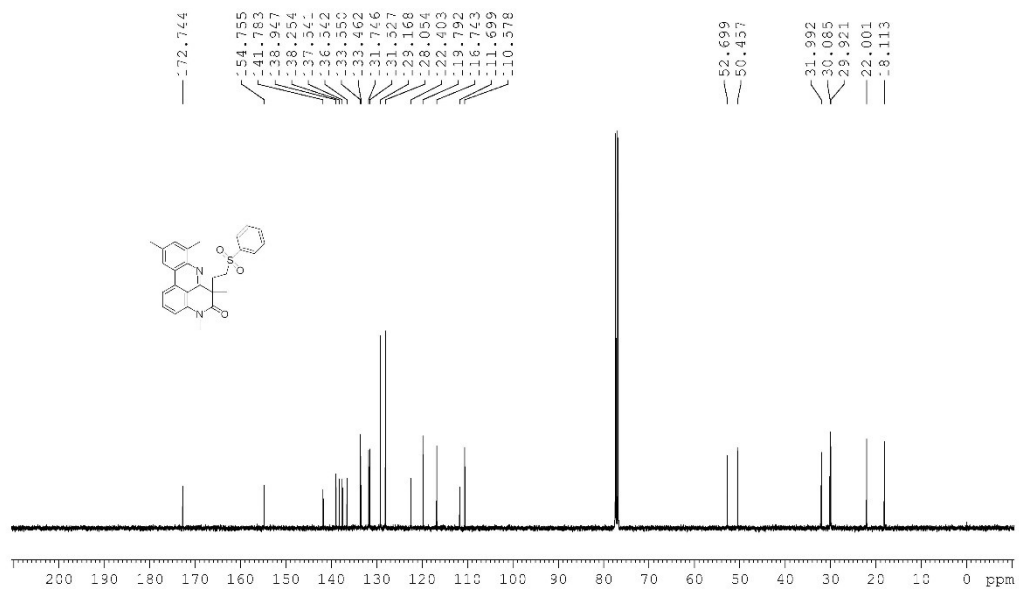

<sup>13</sup>C NMR spectrum of compound 3r



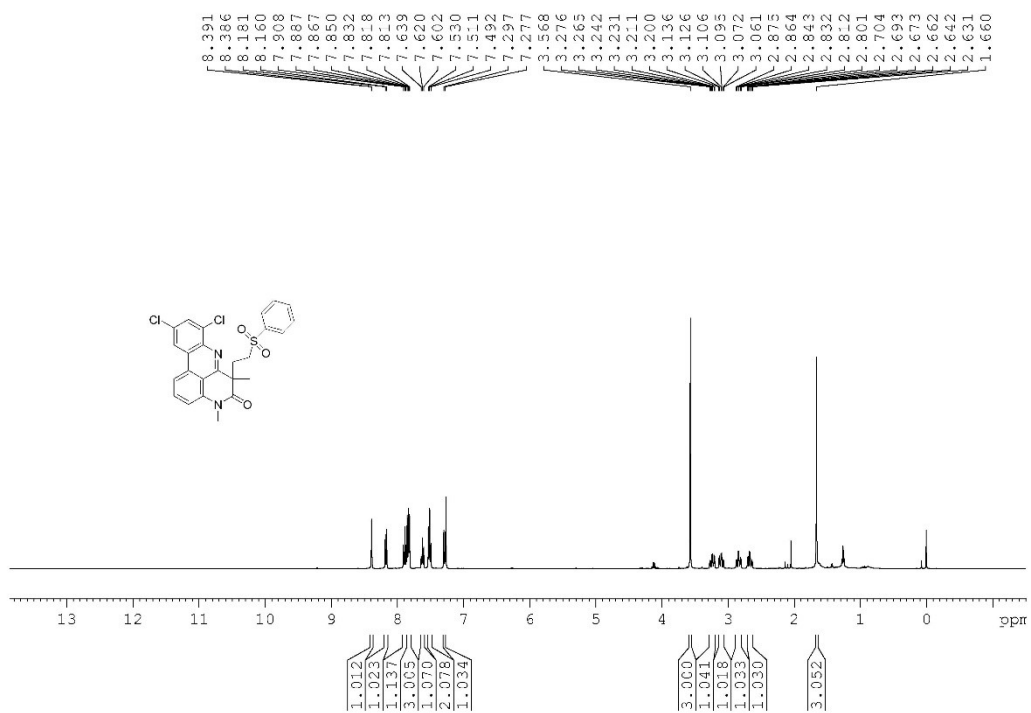

<sup>1</sup>H NMR spectrum of compound 3s

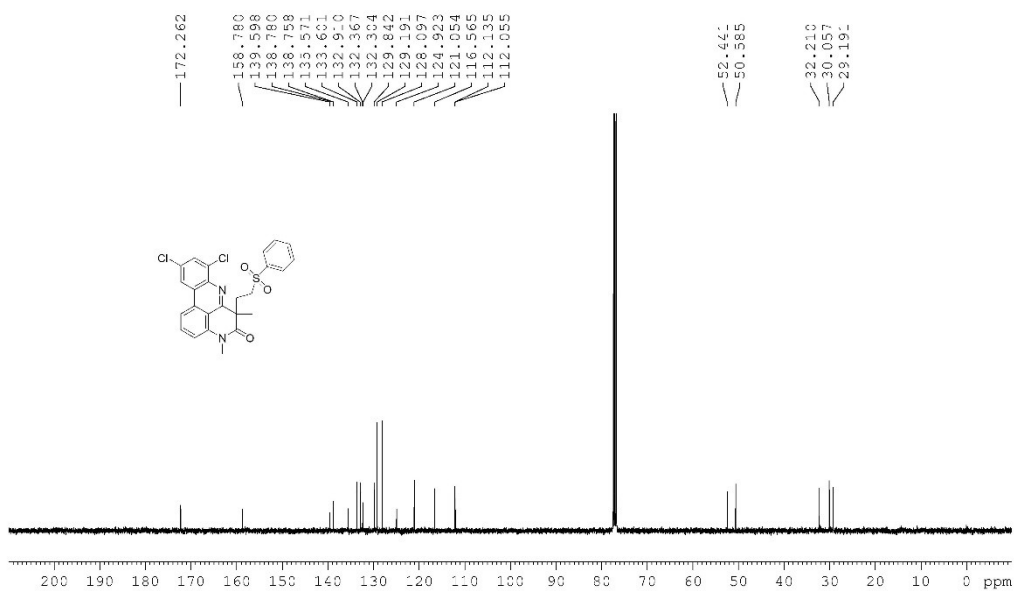

<sup>13</sup>C NMR spectrum of compound 3s

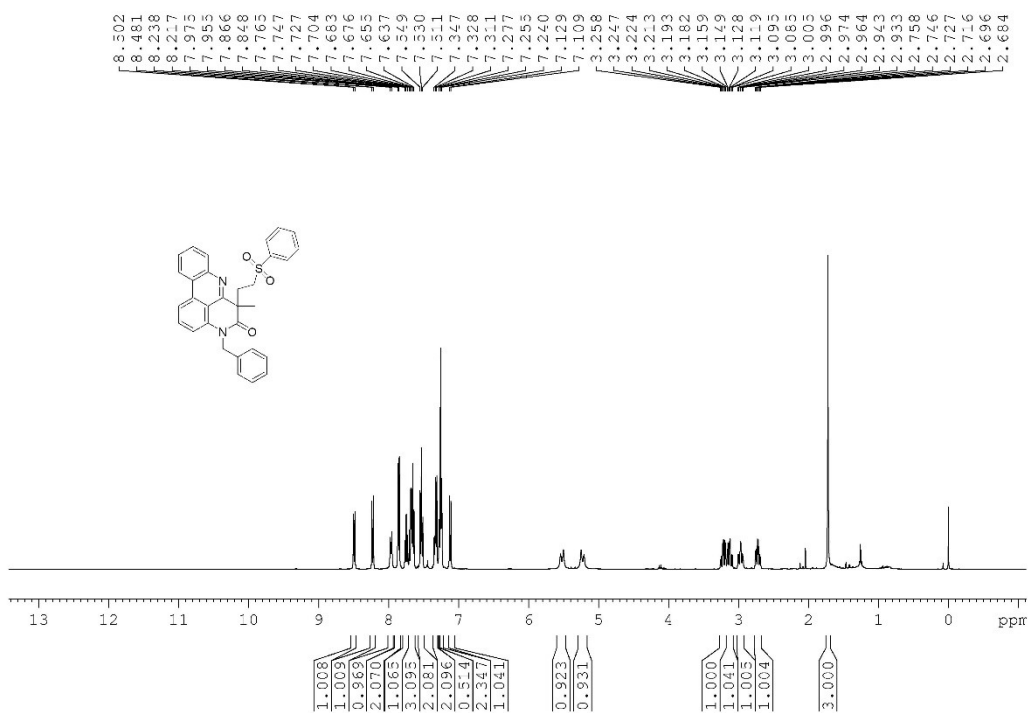

<sup>1</sup>H NMR spectrum of compound 3t

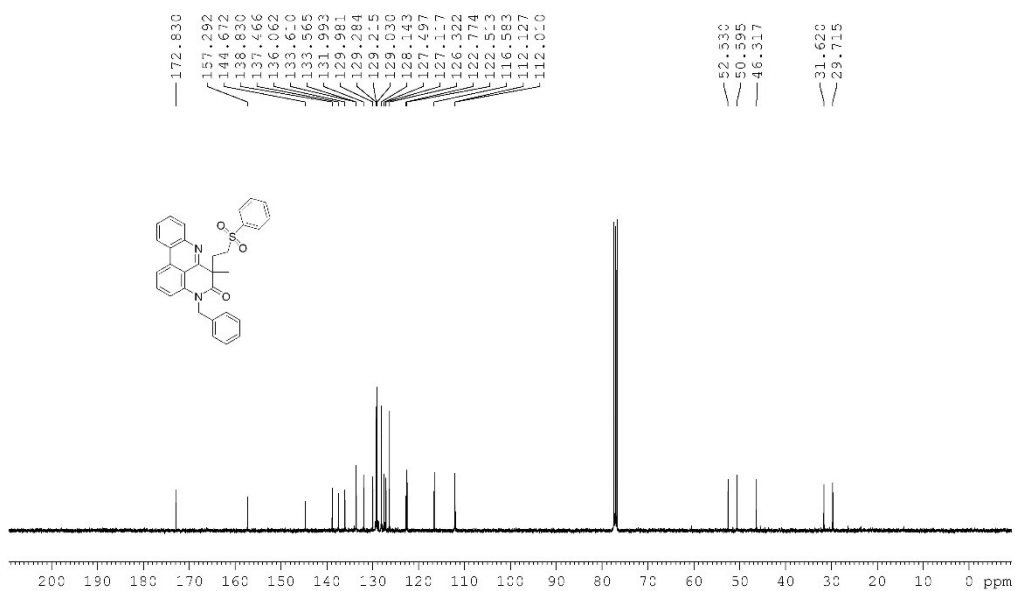

<sup>13</sup>C NMR spectrum of compound 3t

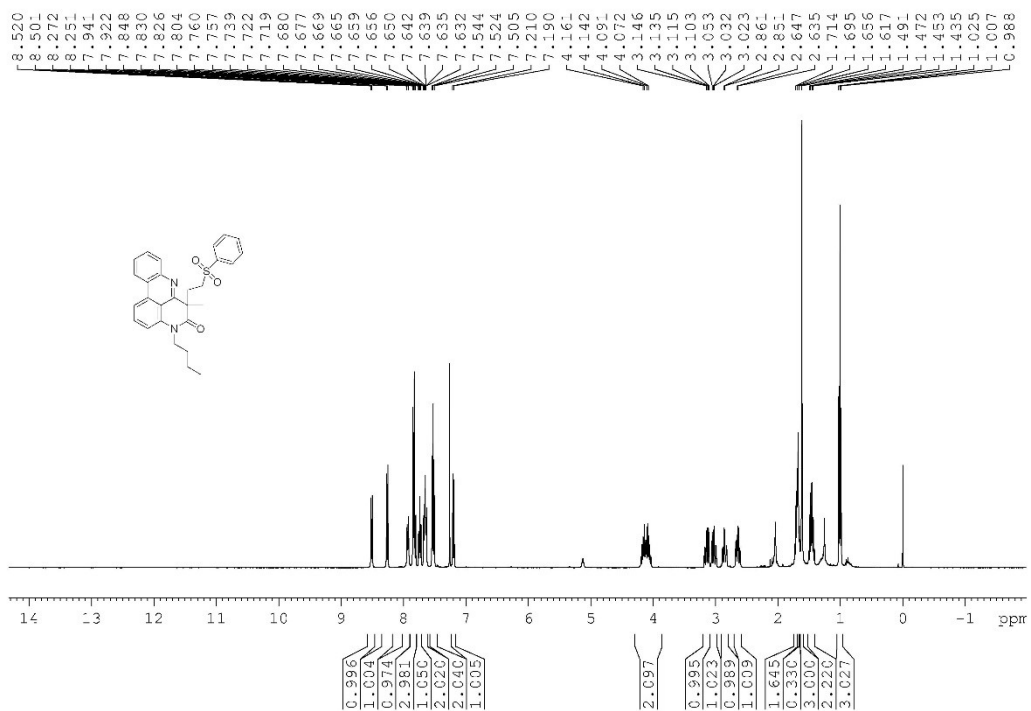

<sup>1</sup>H NMR spectrum of compound **3u**

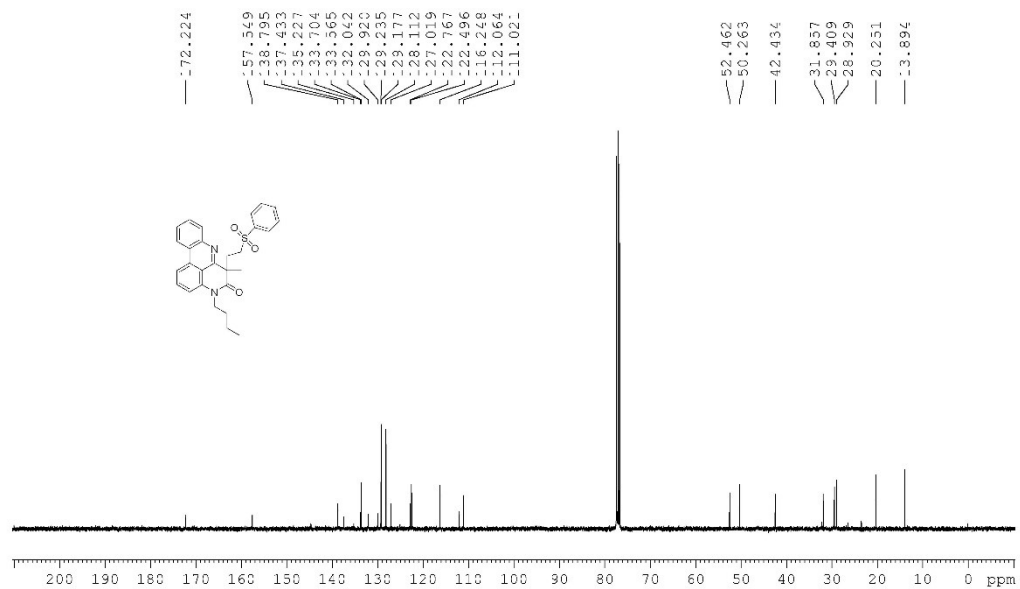

<sup>13</sup>C NMR spectrum of compound **3u**

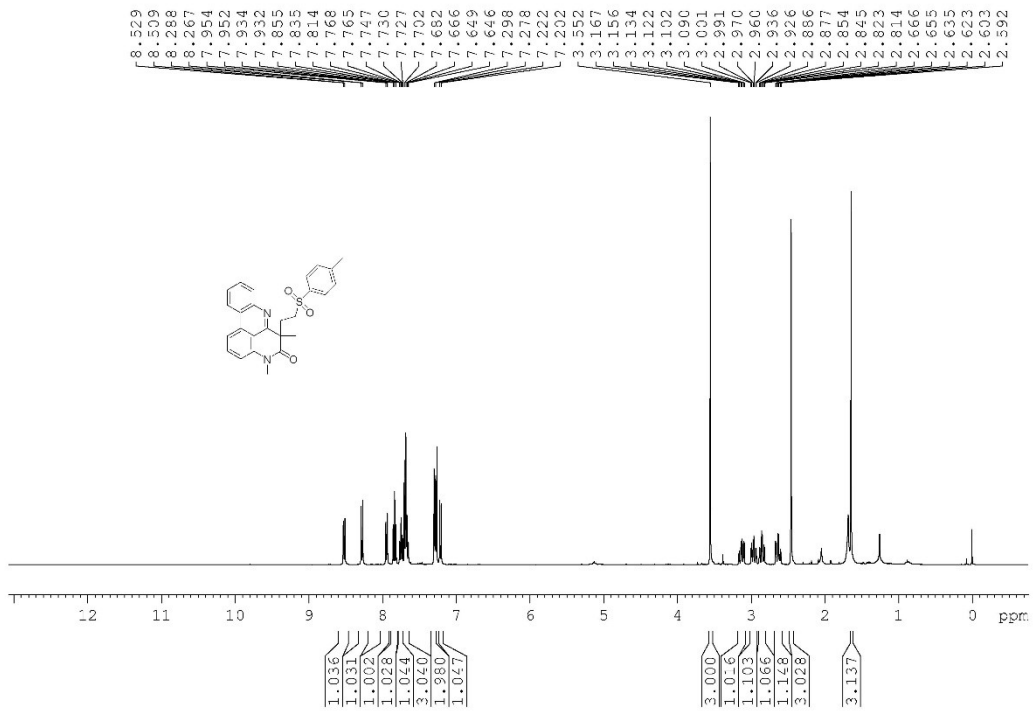

<sup>1</sup>H NMR spectrum of compound 3w

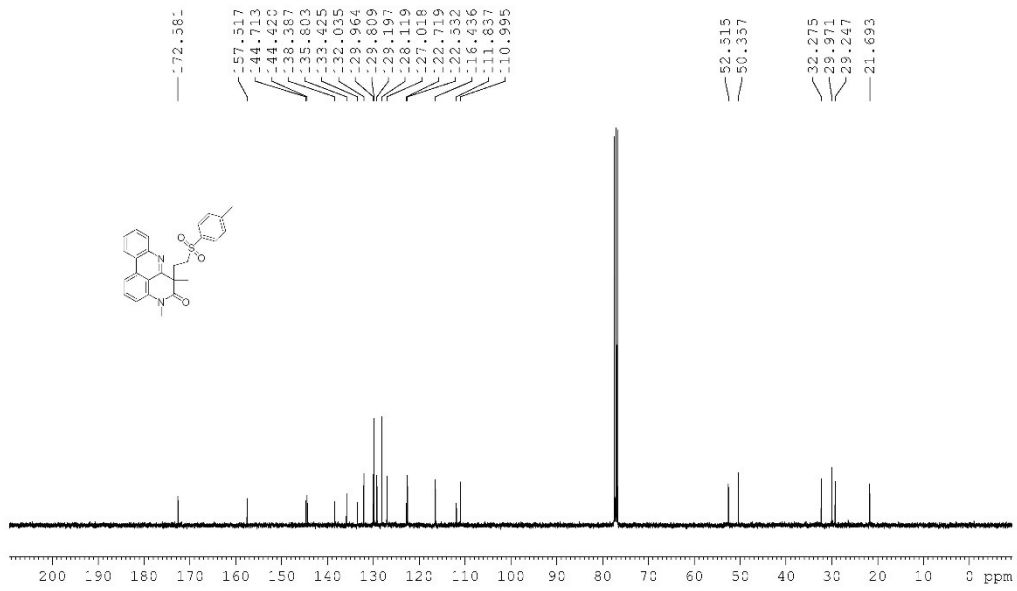

<sup>13</sup>C NMR spectrum of compound 3w

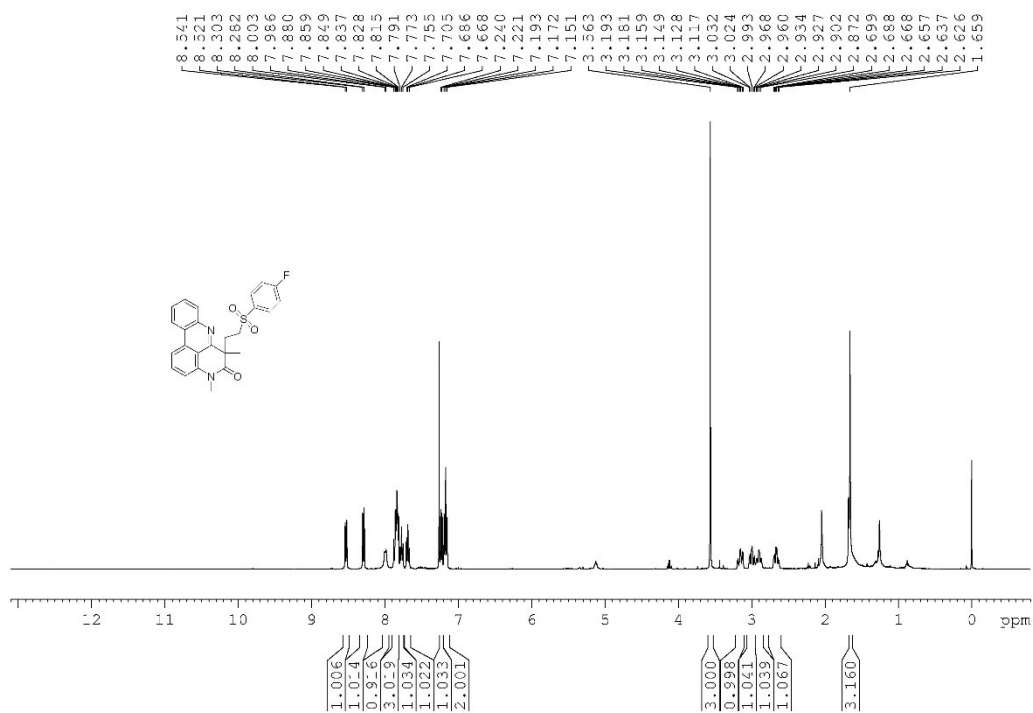

<sup>1</sup>H NMR spectrum of compound 3x

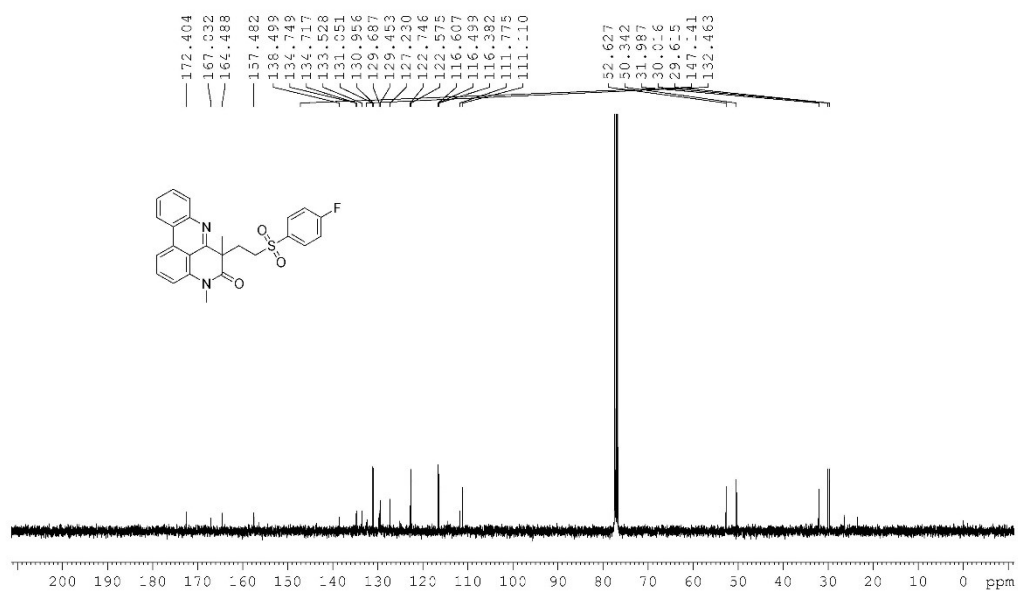

<sup>13</sup>C NMR spectrum of compound 3x

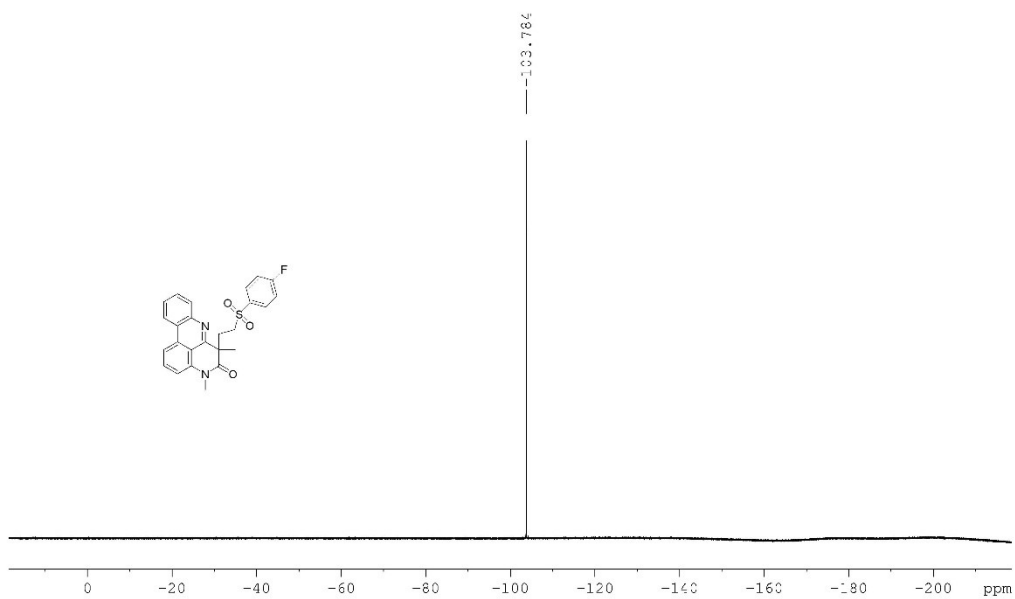

$^{19}\text{F}$  NMR spectrum of compound 3x

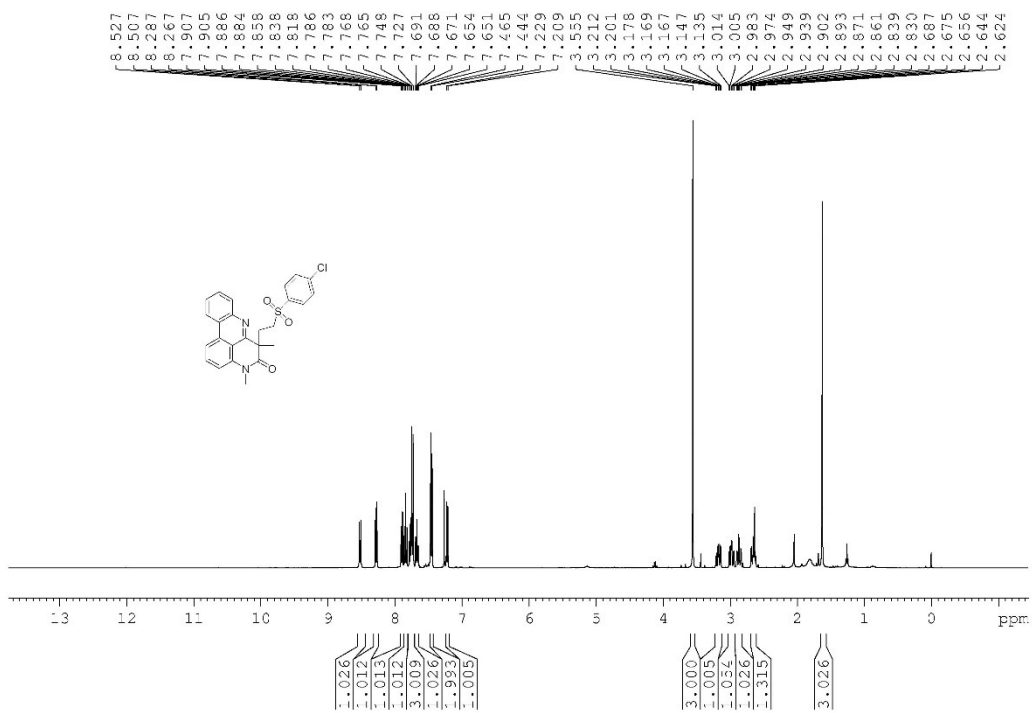

$^1\text{H}$  NMR spectrum of compound 3y

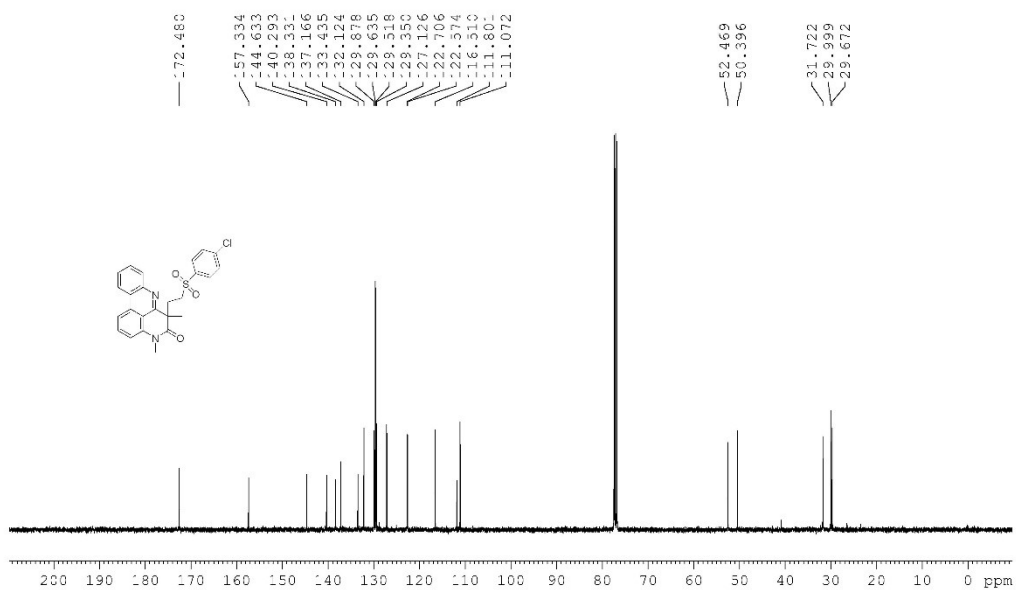

<sup>13</sup>C NMR spectrum of compound **3y**

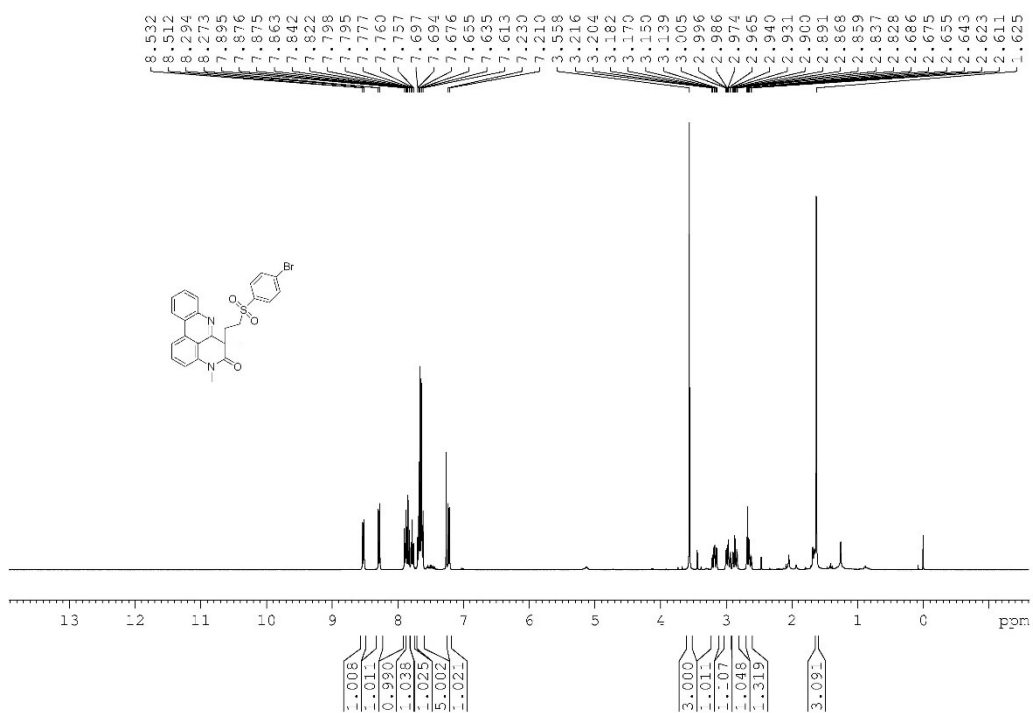

<sup>1</sup>H NMR spectrum of compound **3z**

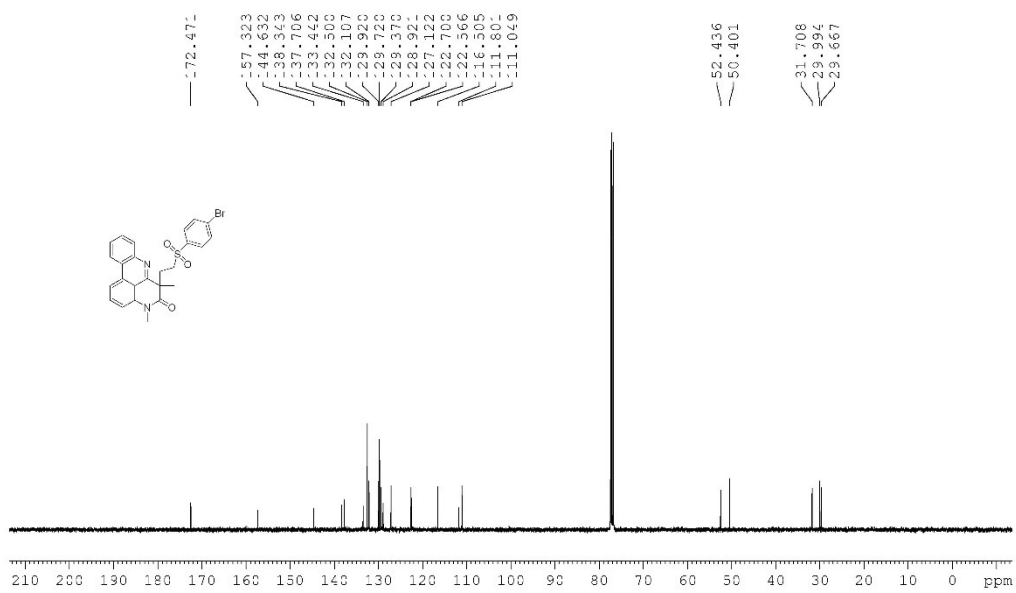

<sup>13</sup>C NMR spectrum of compound **3z**

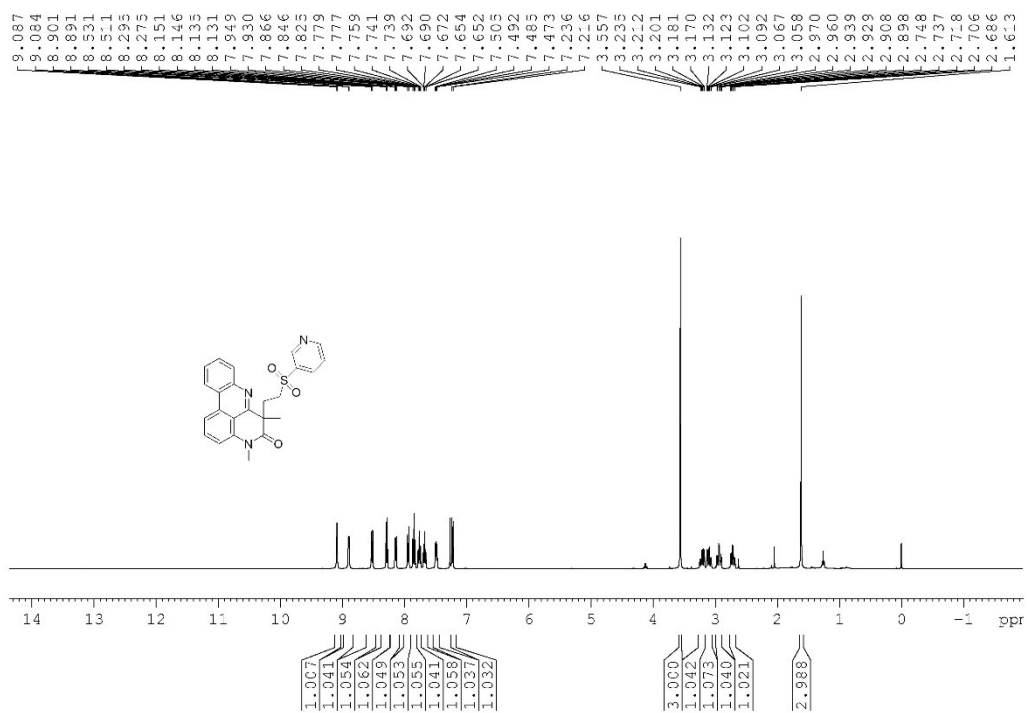

<sup>1</sup>H NMR spectrum of compound **3aa**



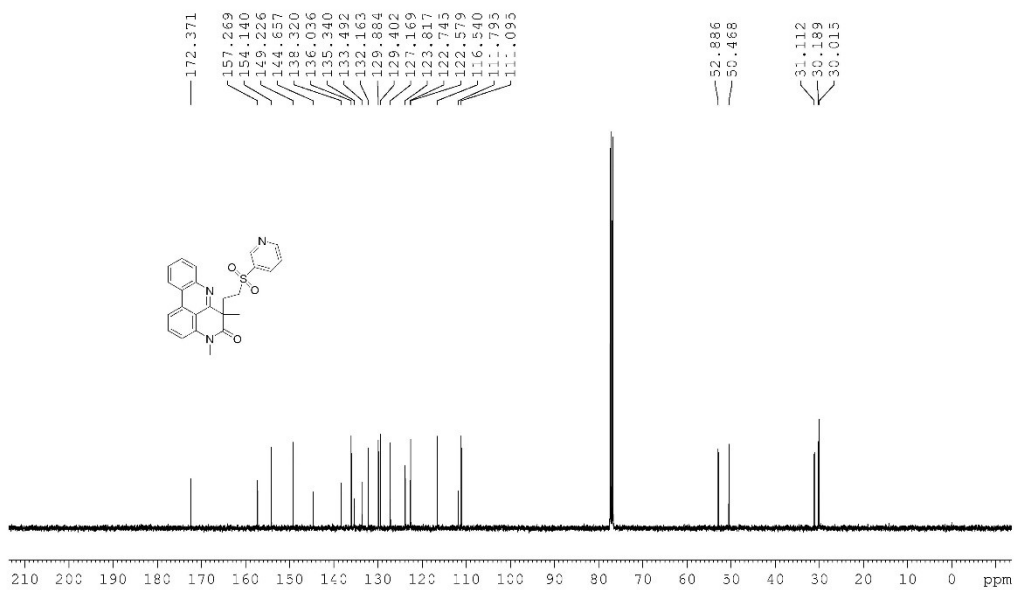

**<sup>13</sup>C NMR spectrum of compound 3aa**

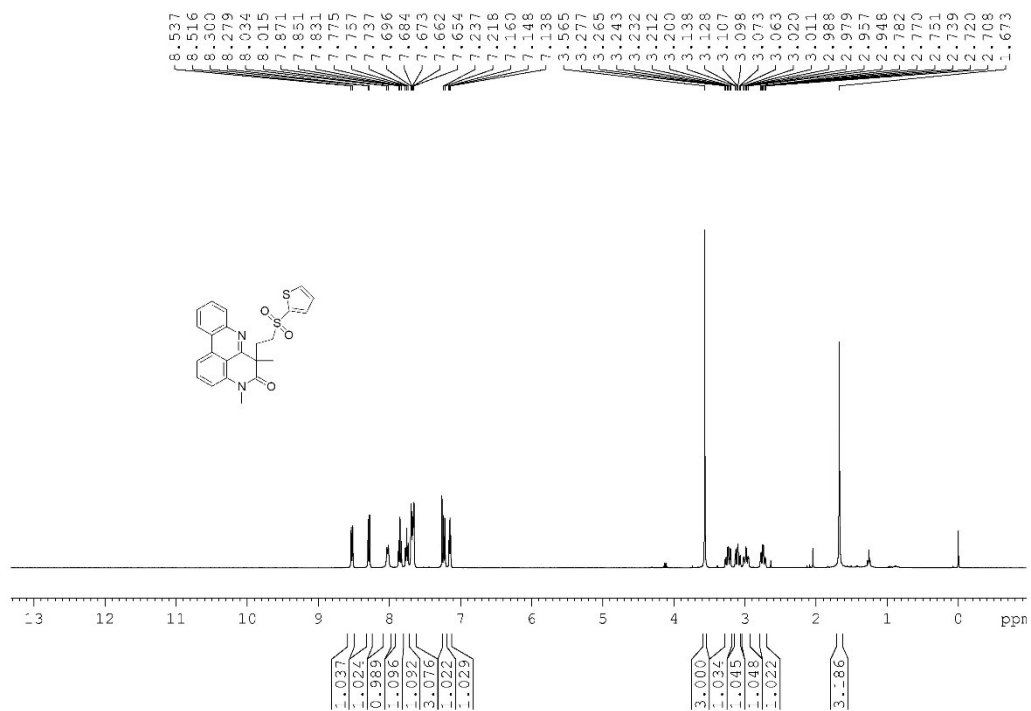

**<sup>1</sup>H NMR spectrum of compound 3ab**

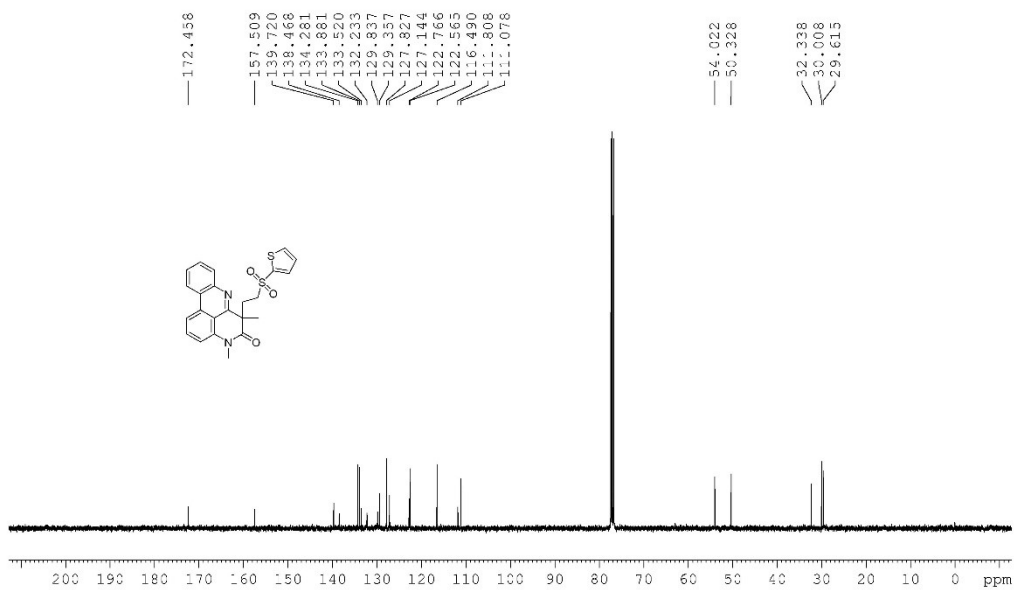

<sup>13</sup>C NMR spectrum of compound **3ab**

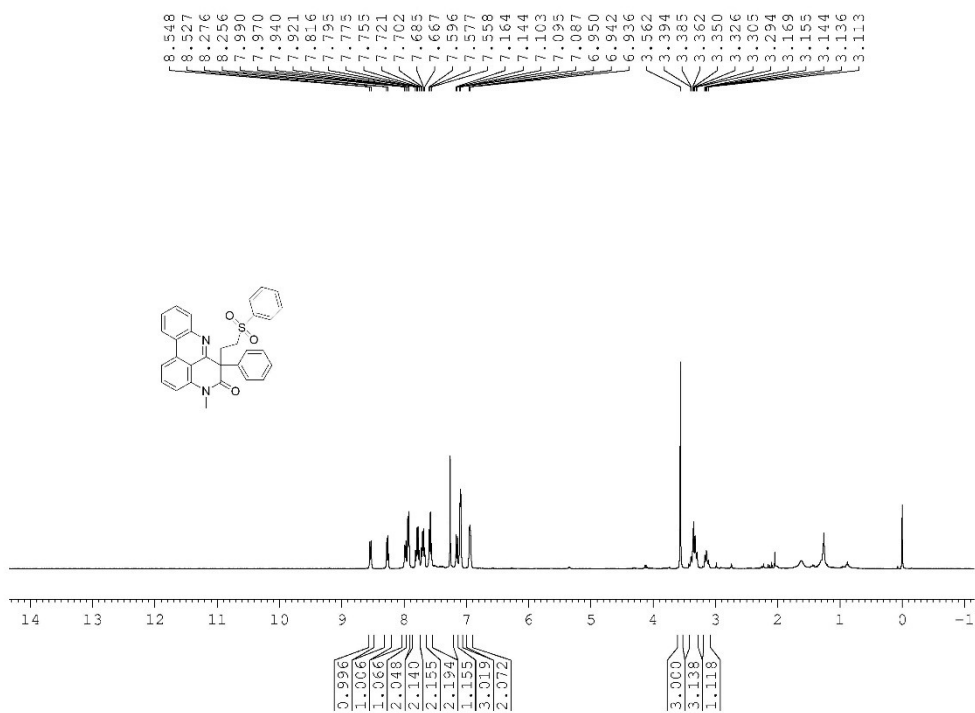

<sup>1</sup>H NMR spectrum of compound **3ac**

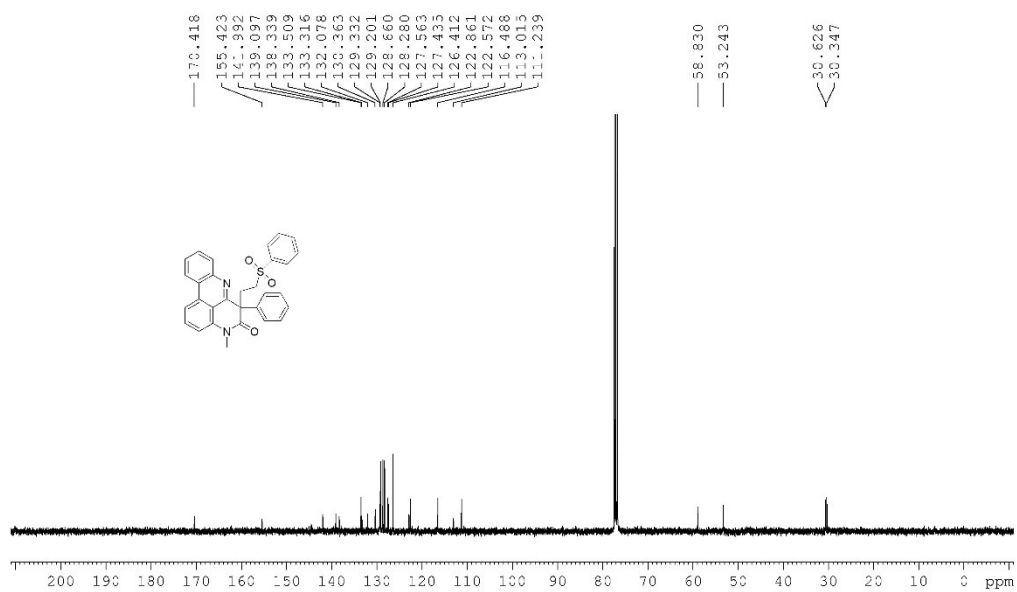

$^{13}\text{C}$  NMR spectrum of compound **3ac**
